# Supplementary material for: Exploring the complementarity of fast multipulse and multidimensional NMR methods for metabolomics: a chemical ecology case study
Source: Royal Society of Chemistry journal article supplement (doi:10.1039/d4ay01225a), 2024-01-01
Supplement: d4ay01225a1.pdf [file d4ay01225a1.pdf]

## SUPPORTING INFORMATION

### Exploring the complementarity of fast multipulse and multidimensional NMR methods for metabolomics: a chemical ecology case study

Aurore Michaud<sup>1,2</sup>, Samuel Bertrand<sup>2,3</sup>, Serge Akoka<sup>1</sup>, Jonathan Farjon<sup>1</sup>, Estelle Martineau<sup>1</sup>, Nicolas Ruiz<sup>2</sup>, Thibaut Robiou Du Pont<sup>2</sup>, Olivier Grovel<sup>2\*\*</sup>, Patrick Giraudeau<sup>1\*</sup>

<sup>1</sup>Nantes Université, CNRS, CEISAM UMR 6230, F-44000 Nantes, France.

\*Email: [patrick.giraudeau@univ-nantes.fr](mailto:patrick.giraudeau@univ-nantes.fr)

<sup>2</sup>Nantes Université, Institut des Substances et Organismes de la Mer, ISOMer, UR 2160, F-44000 Nantes, France

\*\*Email: [olivier.grovel@univ-nantes.fr](mailto:olivier.grovel@univ-nantes.fr)

<sup>3</sup>Nantes Université, École Centrale Nantes, CNRS, LS2N, UMR 6004, F-44000 Nantes, France

## Figures

|                                                                                                                                                                                                                                                                                                                                                                                                                                      |     |
|--------------------------------------------------------------------------------------------------------------------------------------------------------------------------------------------------------------------------------------------------------------------------------------------------------------------------------------------------------------------------------------------------------------------------------------|-----|
| Figure SI 1 - 2D PCA score plots with QC: (A) $^1\text{H}$ ; (B) $^{13}\text{C}$ ; (C) UF COSY; (D) SYMAPS HSQC .....                                                                                                                                                                                                                                                                                                                | 3   |
| Figure SI 2 - NMR data processing workflow .....                                                                                                                                                                                                                                                                                                                                                                                     | 4   |
| Figure SI 3 - 2D PCA score plots: (A) $^1\text{H}$ ; (B) $^{13}\text{C}$ ; (C) UF COSY; (D) SYMAPS HSQC.....                                                                                                                                                                                                                                                                                                                         | 5   |
| Figure SI 4 - $^1\text{H}$ OPLS-DA score plot: medium effect .....                                                                                                                                                                                                                                                                                                                                                                   | 6   |
| Figure SI 5 - $^{13}\text{C}$ INEPT OPLS-DA score plot: medium effect.....                                                                                                                                                                                                                                                                                                                                                           | 7   |
| Figure SI 6 - UF COSY OPLS-DA score plot: medium effect .....                                                                                                                                                                                                                                                                                                                                                                        | 8   |
| Figure SI 7 - SYMAPS HSQC OPLS-DA score plot : medium effect.....                                                                                                                                                                                                                                                                                                                                                                    | 9   |
| Figure SI 8 - Distribution of the 100 first VIPs and all $^1\text{H}$ buckets: the upper part reports the 100 first VIP buckets highlighted by OPLS-DA analysis; the lower part reports all $^1\text{H}$ buckets. Color code corresponds to bucket density in the spectrum range, from low amount (blue), to medium (white) and high (red). .....                                                                                    | 10  |
| Figure SI 9 - Distribution of the 100 first VIP and all $^{13}\text{C}$ INEPT buckets: the upper part reports the 100 first VIP buckets highlighted by OPLS-DA analysis; the lower part reports all $^{13}\text{C}$ buckets. Color code corresponds to bucket density in the spectrum range, from low amount (blue), to medium (white) and high (red). .....                                                                         | 10  |
| Figure SI 10 - Spectral distribution of UF COSY buckets. Color code corresponds to bucket density in the spectrum range, from low amount (blue), to medium (white) and high (red). .....                                                                                                                                                                                                                                             | 11  |
| Figure SI 11 - Spectral distribution of the first 100 VIP in UF COSY. Color code corresponds to bucket density in the spectrum range, from low amount (blue), to medium (white) and high (red). .....                                                                                                                                                                                                                                | 12  |
| Figure SI 12 - SYMAPS HSQC with $^1\text{H}$ and numerically folded $^{13}\text{C}$ INEPT spectra as projections: on the top, 1D $^1\text{H}$ spectrum with their 100 first OPLS-DA VIP buckets in red, on the bottom left, 1D $^{13}\text{C}$ INEPT numerically folded spectrum with their 100 first OPLS-DA VIP buckets in red, on the bottom right, 2D SYMAPS HSQC spectrum with their 100 first OPLS-DA VIP buckets in red. .... | 133 |
| Figure SI 13 - Spectral distribution of SYMAPS HSQC buckets. Color code corresponds to bucket density in the spectrum range, from low amount (blue), to medium (white) and high (red). .....                                                                                                                                                                                                                                         | 144 |
| Figure SI 14 - Spectral distribution of the first 100 VIP in SYMAPS HSQC. Color code corresponds to bucket density in the spectrum range, from low amount (blue), to medium (white) and high (red). .....                                                                                                                                                                                                                            | 14  |

## Tables

|                                                                                                                                                                                                                                                                                                                                                                                                                                                                                  |    |
|----------------------------------------------------------------------------------------------------------------------------------------------------------------------------------------------------------------------------------------------------------------------------------------------------------------------------------------------------------------------------------------------------------------------------------------------------------------------------------|----|
| Table SI 1 - OPLS-DA model parameters for the four NMR methods according the tested parameter (medium, time effects): "Medium" lines are the OPLS-DA results for Control (T1 + T2) samples versus Sponge (T1 + T2). Other lines show the effect time on T1 or T2 samples only. "Time" lines are the OPLS-DA results for T1 (Control + Sponge) vs T2 (Control + Sponge). For this study, we concentrate only on the results obtained on Medium lines to compare NMR methods. .... | 15 |
| Table SI 2 - 100 first $^1\text{H}$ VIP buckets from OPLS-DA (Part 1/3) .....                                                                                                                                                                                                                                                                                                                                                                                                    | 16 |
| Table SI 3 - 100 first $^1\text{H}$ VIP buckets from OPLS-DA (Part 2/3) .....                                                                                                                                                                                                                                                                                                                                                                                                    | 17 |
| Table SI 4 - 100 first $^1\text{H}$ VIP buckets from OPLS-DA (Part 3/3) .....                                                                                                                                                                                                                                                                                                                                                                                                    | 18 |
| Table SI 5 - 100 first $^{13}\text{C}$ VIP buckets from OPLS-DA (Part 1/3).....                                                                                                                                                                                                                                                                                                                                                                                                  | 19 |
| Table SI 6 - 100 first $^{13}\text{C}$ VIP buckets from OPLS-DA (Part 2/3).....                                                                                                                                                                                                                                                                                                                                                                                                  | 20 |
| Table SI 7 - 100 first $^{13}\text{C}$ VIP buckets from OPLS-DA (Part 3/3).....                                                                                                                                                                                                                                                                                                                                                                                                  | 21 |
| Table SI 8 - 100 first UF COSY VIP buckets from OPLS-DA (Part 1/3).....                                                                                                                                                                                                                                                                                                                                                                                                          | 22 |
| Table SI 9- 100 first UF COSY VIP buckets from OPLS-DA (Part 2/3).....                                                                                                                                                                                                                                                                                                                                                                                                           | 23 |
| Table SI 10 - 100 first UF COSY VIP buckets from OPLS-DA (Part 3/3).....                                                                                                                                                                                                                                                                                                                                                                                                         | 24 |
| Table SI 11 - 100 first SYMAPS HSQC VIP buckets from OPLS-DA (Part 1/3) .....                                                                                                                                                                                                                                                                                                                                                                                                    | 25 |
| Table SI 12 - 100 first SYMAPS HSQC buckets from OPLS-DA (Part 2/3) .....                                                                                                                                                                                                                                                                                                                                                                                                        | 26 |
| Table SI 13 - 100 first SYMAPS HSQC VIP buckets from OPLS-DA (Part 3/3) .....                                                                                                                                                                                                                                                                                                                                                                                                    | 27 |
| Table SI 14 - Global data for all $^1\text{H}$ NMR buckets .....                                                                                                                                                                                                                                                                                                                                                                                                                 | 27 |
| Table SI 15 - Global data for all $^{13}\text{C}$ NMR buckets .....                                                                                                                                                                                                                                                                                                                                                                                                              | 28 |

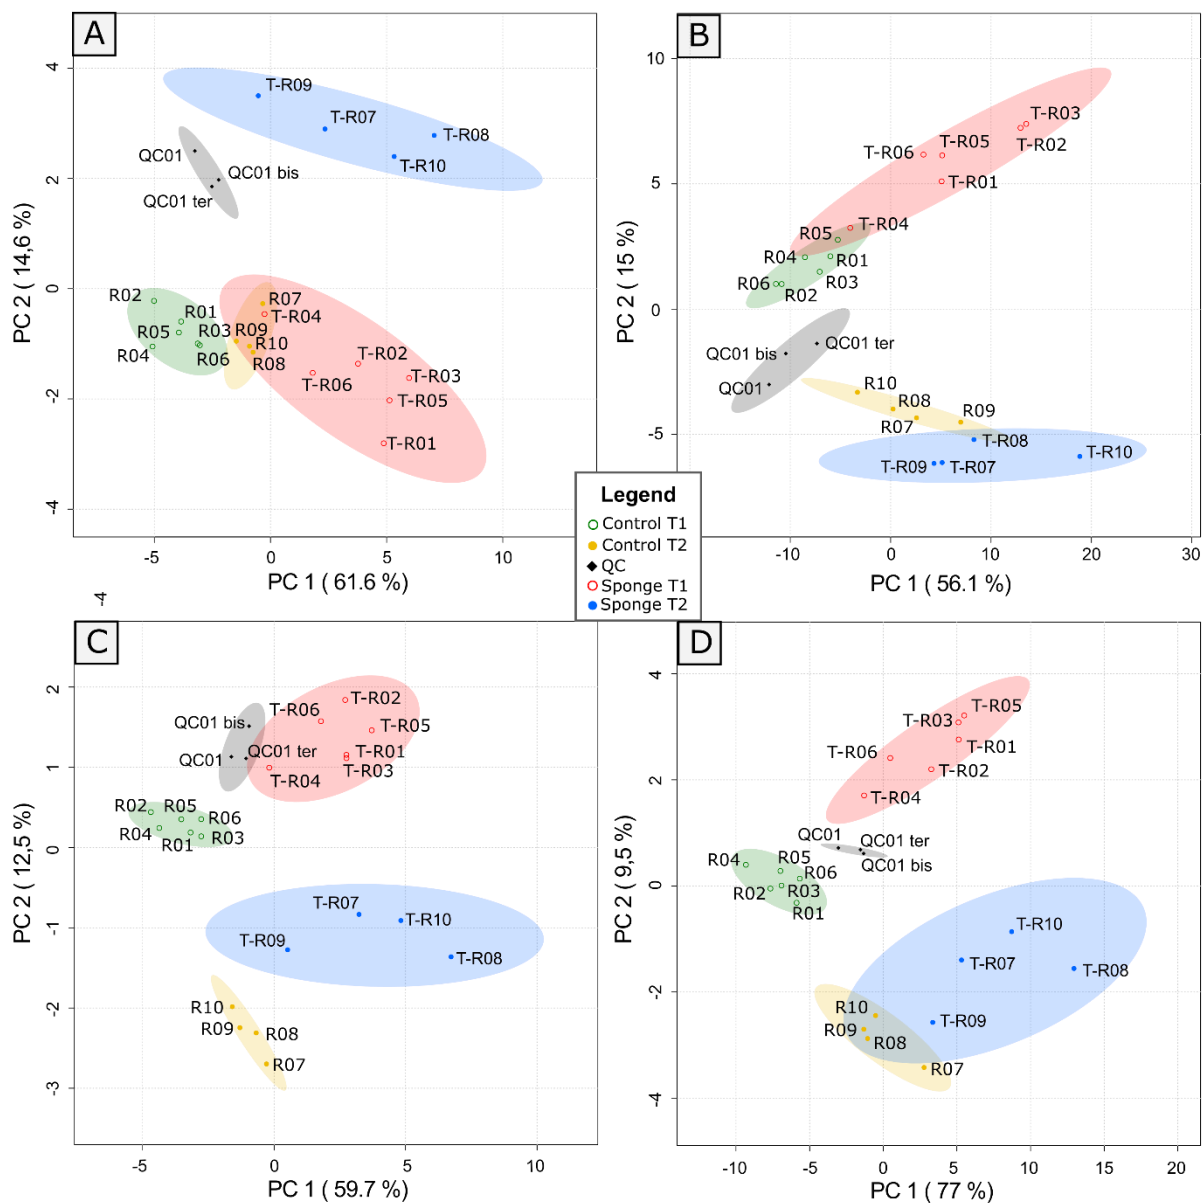

Figure SI 1 - 2D PCA score plots with QC: (A)  $^1\text{H}$ ; (B)  $^{13}\text{C}$ ; (C) UF COSY; (D) SYMAPS HSQC

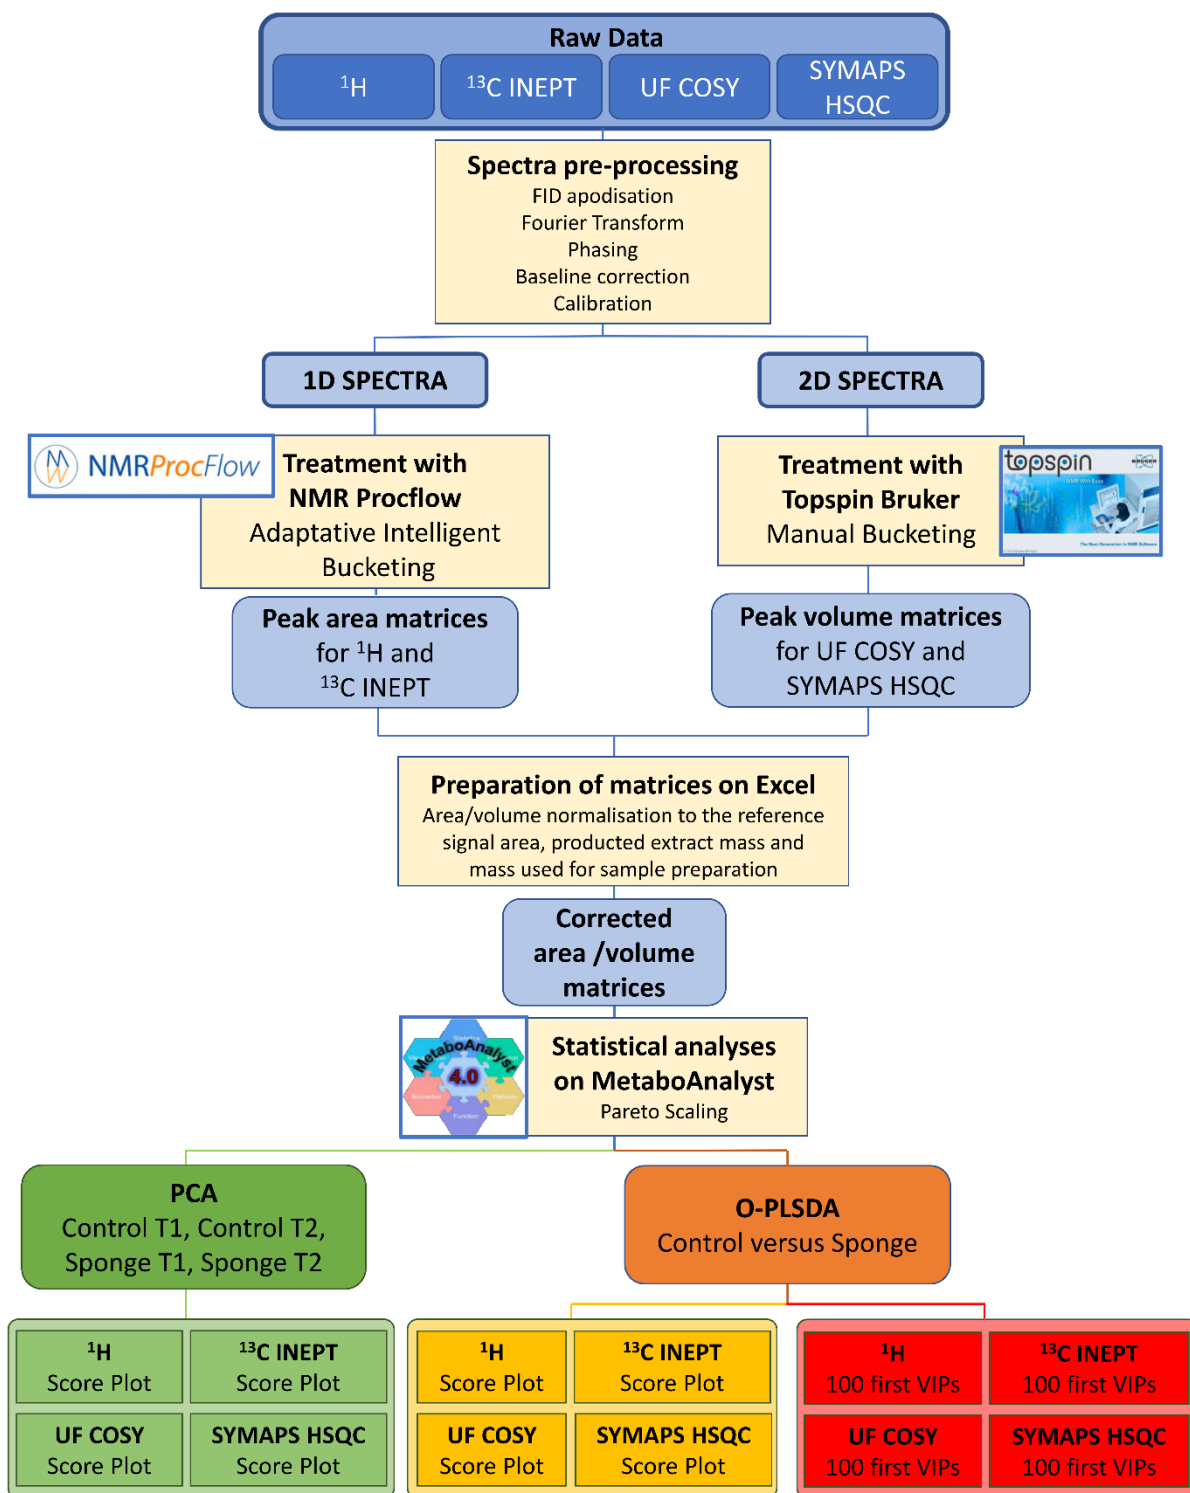

Figure SI 2 - NMR data processing workflow

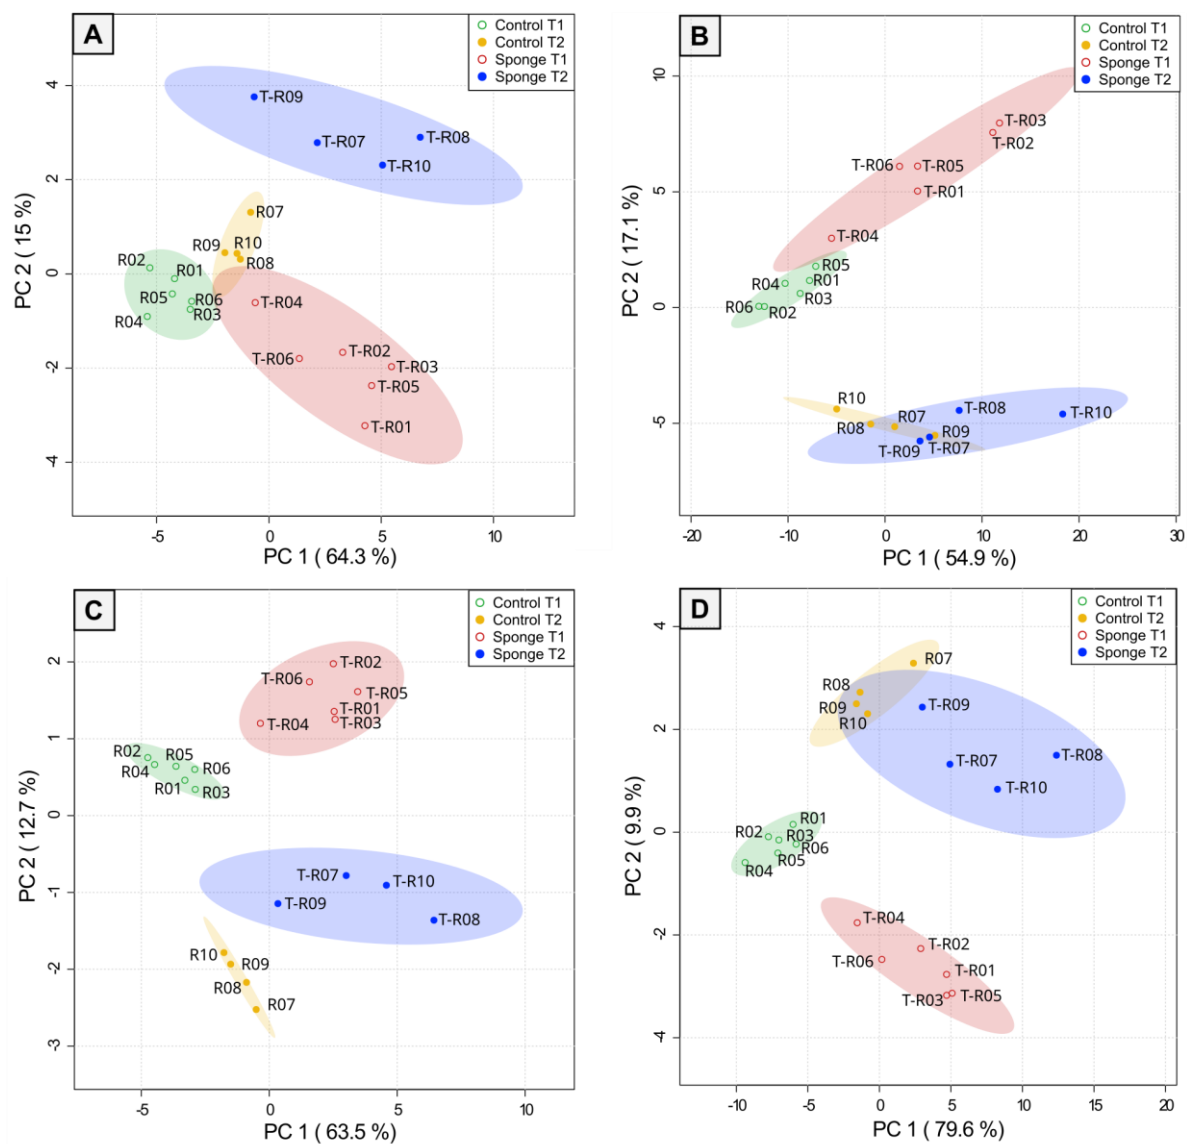

**Figure SI 3 - 2D PCA score plots: (A)  $^1\text{H}$ ; (B)  $^{13}\text{C}$ ; (C) UF COSY; (D) SYMAPS HSQC**

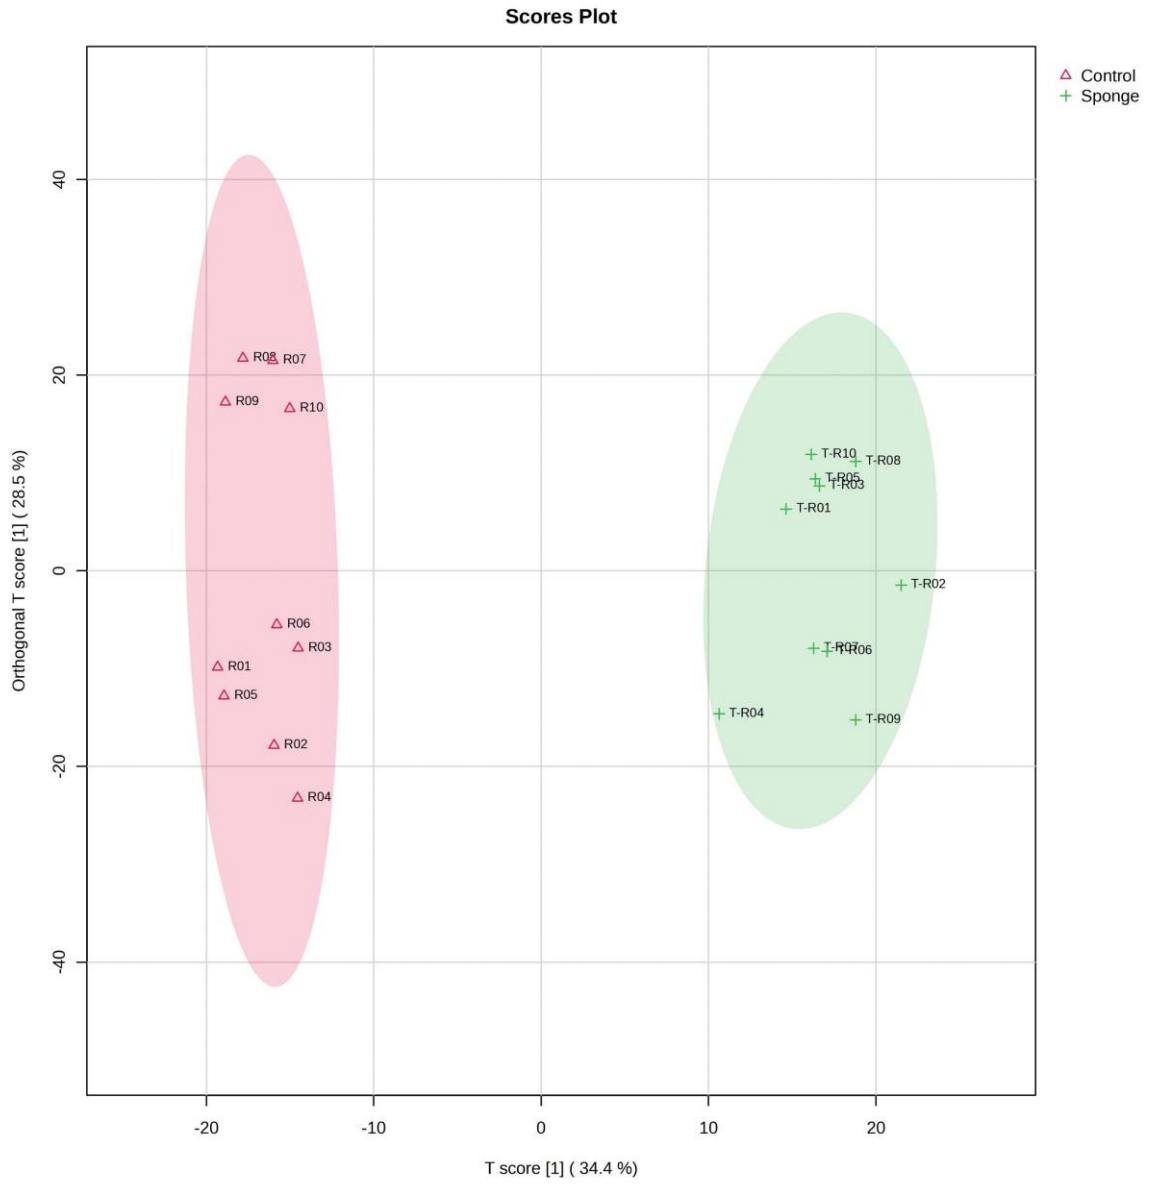

Figure SI 4 - <sup>1</sup>H OPLS-DA score plot: medium effect

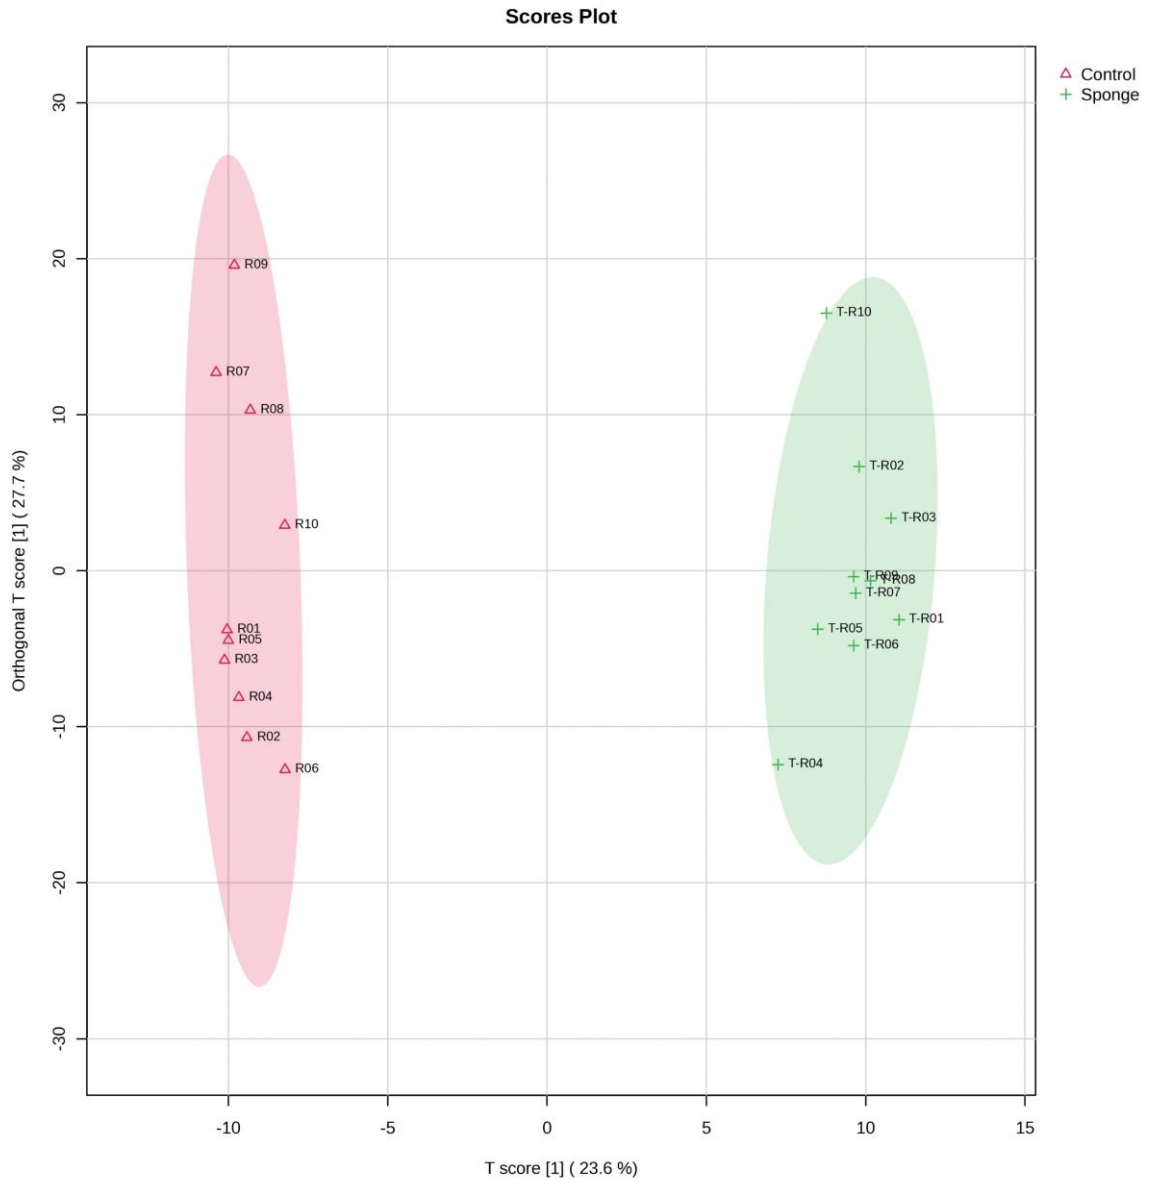

Figure SI 5 - <sup>13</sup>C INEPT OPLS-DA score plot: medium effect

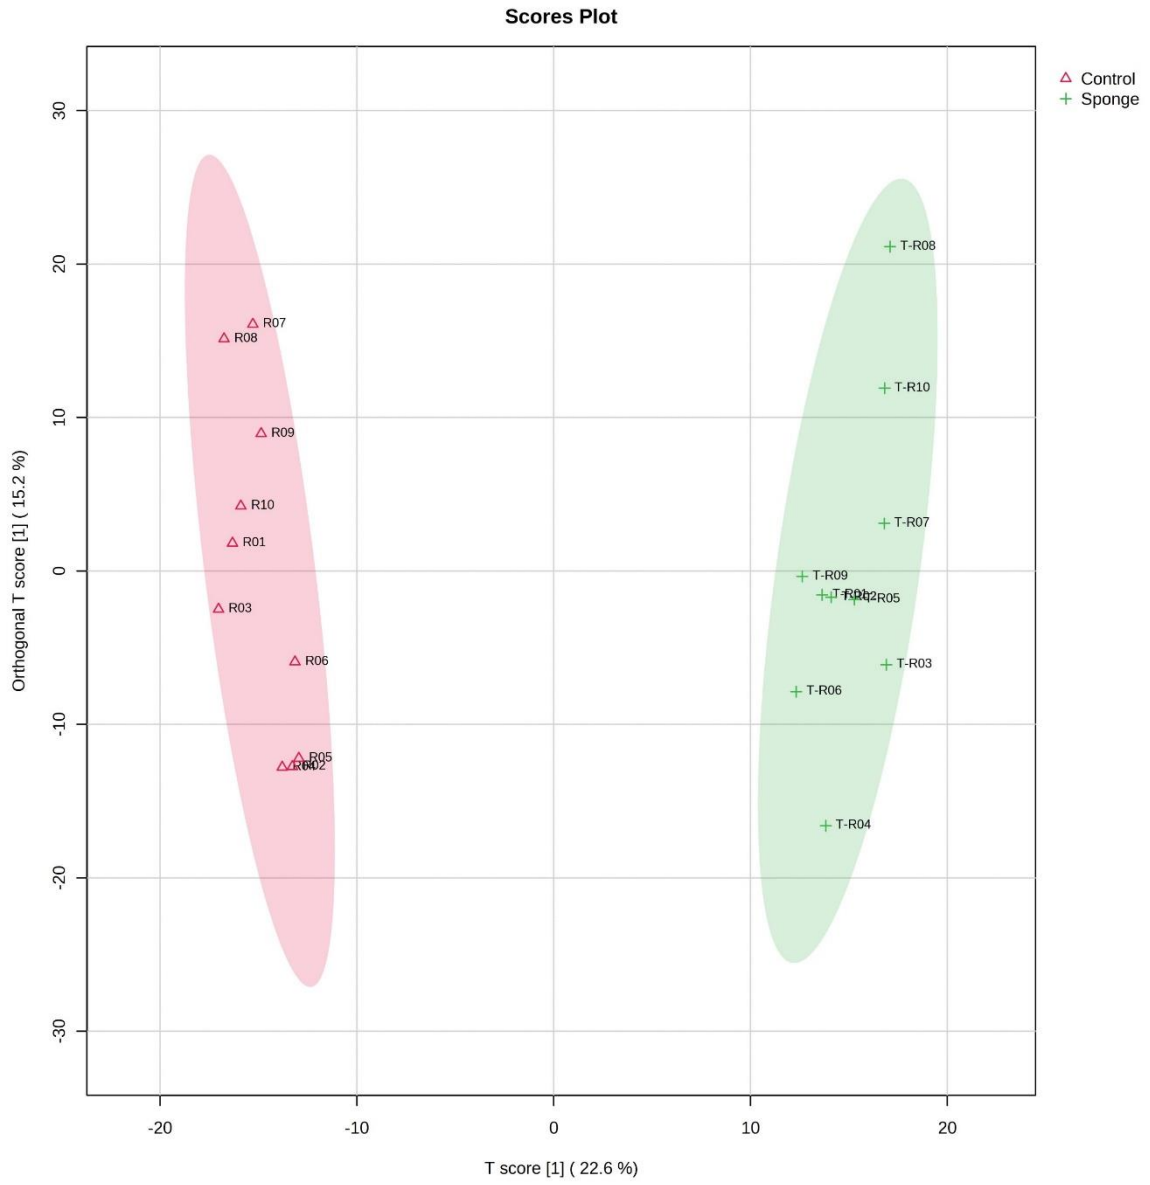

Figure SI 6 - UF COSY OPLS-DA score plot: medium effect



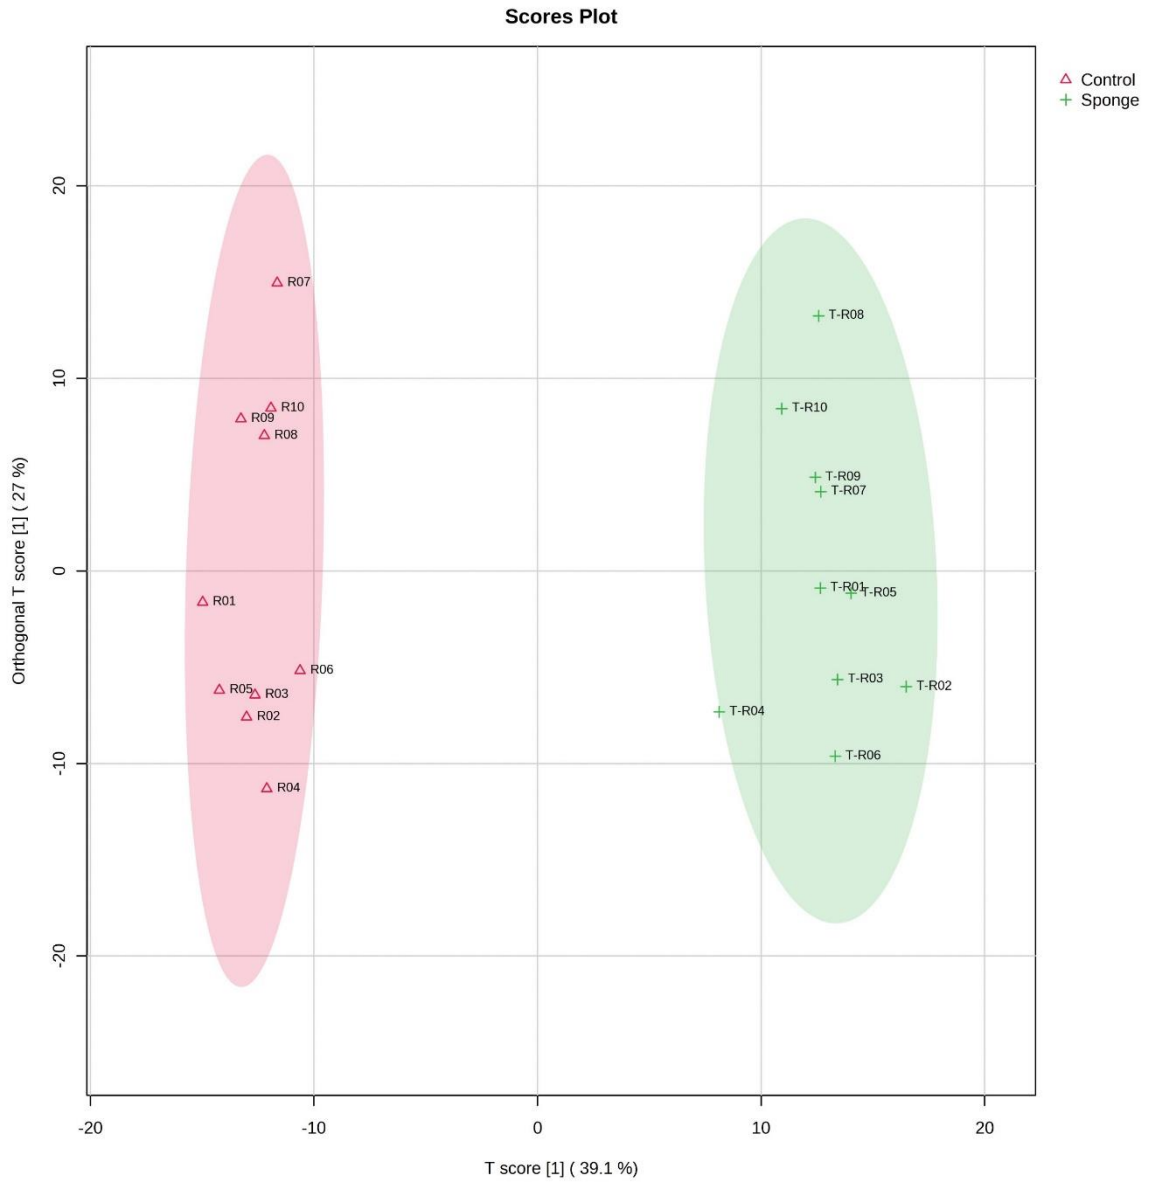

Figure SI 7 - SYMAPS HSQC OPLS-DA score plot : medium effect

### 100 first VIP buckets

| 15 to 16 ppm | 14 to 15 ppm | 13 to 14 ppm | 12 to 13 ppm | 11 to 12 ppm | 10 to 11 ppm | 9 to 10 ppm | 8 to 9 ppm | 7 to 8 ppm | 6 to 7 ppm | 5 to 6 ppm | 4 to 5 ppm | 3 to 4 ppm | 2 to 3 ppm | 1 to 2 ppm | 0 to 1 ppm |
|--------------|--------------|--------------|--------------|--------------|--------------|-------------|------------|------------|------------|------------|------------|------------|------------|------------|------------|
| 0            | 0            | 0            | 0            | 2            | 3            | 0           | 0          | 12         | 16         | 26         | 2          | 4          | 3          | 14         | 1          |

### All buckets

| 15 to 16 ppm | 14 to 15 ppm | 13 to 14 ppm | 12 to 13 ppm | 11 to 12 ppm | 10 to 11 ppm | 9 to 10 ppm | 8 to 9 ppm | 7 to 8 ppm | 6 to 7 ppm | 5 to 6 ppm | 4 to 5 ppm | 3 to 4 ppm | 2 to 3 ppm | 1 to 2 ppm | 0 to 1 ppm |
|--------------|--------------|--------------|--------------|--------------|--------------|-------------|------------|------------|------------|------------|------------|------------|------------|------------|------------|
| 1            | 0            | 0            | 9            | 11           | 33           | 19          | 35         | 99         | 111        | 106        | 91         | 98         | 91         | 106        | 90         |

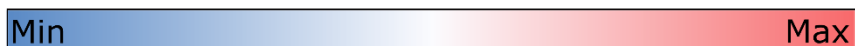

**Figure SI 8 - Distribution of the 100 first VIPs and all <sup>1</sup>H buckets:** the upper part reports the 100 first VIP buckets highlighted by OPLS-DA analysis; the lower part reports all <sup>1</sup>H buckets. Color code corresponds to bucket density in the spectrum range, from low amount (blue), to medium (white) and high (red).

### 100 first VIP buckets

| 140 to 150 ppm | 130 to 140 ppm | 120 to 130 ppm | 110 to 120 ppm | 100 to 110 ppm | 90 to 100 ppm | 80 to 90 ppm | 70 to 80 ppm | 60 to 70 ppm | 50 to 60 ppm | 40 to 50 ppm | 30 to 40 ppm | 20 to 30 ppm | 10 to 20 ppm | 0 to 10 ppm |
|----------------|----------------|----------------|----------------|----------------|---------------|--------------|--------------|--------------|--------------|--------------|--------------|--------------|--------------|-------------|
| 6              | 3              | 14             | 23             | 3              | 0             | 0            | 1            | 0            | 4            | 1            | 9            | 28           | 8            | 0           |

### All buckets

| 140 to 150 ppm | 130 to 140 ppm | 120 to 130 ppm | 110 to 120 ppm | 100 to 110 ppm | 90 to 100 ppm | 80 to 90 ppm | 70 to 80 ppm | 60 to 70 ppm | 50 to 60 ppm | 40 to 50 ppm | 30 to 40 ppm | 20 to 30 ppm | 10 to 20 ppm | 0 to 10 ppm | -10 to 0 ppm |
|----------------|----------------|----------------|----------------|----------------|---------------|--------------|--------------|--------------|--------------|--------------|--------------|--------------|--------------|-------------|--------------|
| 18             | 19             | 82             | 62             | 7              | 1             | 0            | 3            | 6            | 23           | 20           | 39           | 83           | 40           | 0           | 5            |

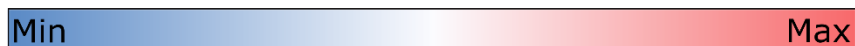

**Figure SI 9 - Distribution of the 100 first VIP and all <sup>13</sup>C INEPT buckets:** the upper part reports the 100 first VIP buckets highlighted by OPLS-DA analysis; the lower part reports all <sup>13</sup>C buckets. Color code corresponds to bucket density in the spectrum range, from low amount (blue), to medium (white) and high (red).

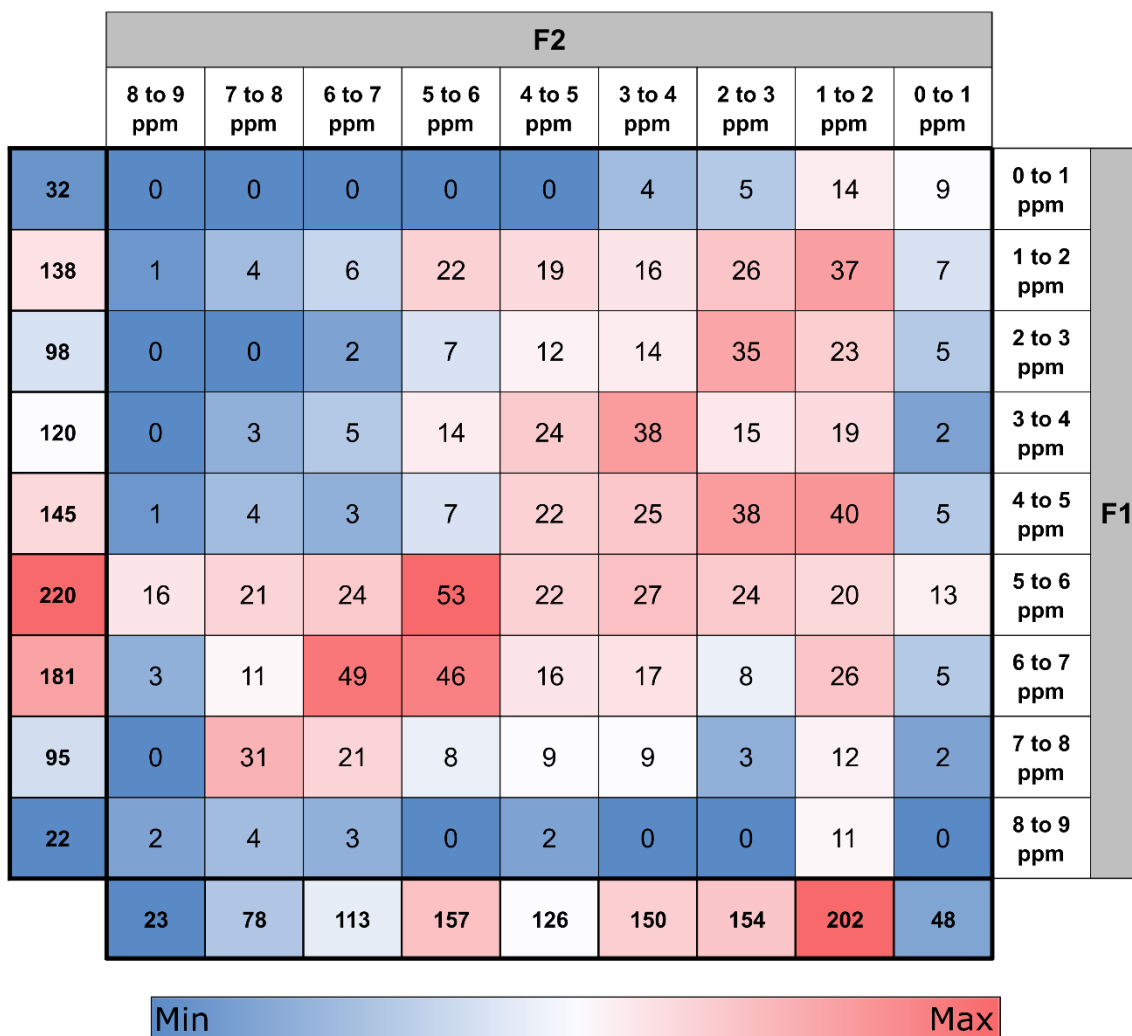

**Figure SI 10 - Spectral distribution of UF COSY buckets.** Color code corresponds to bucket density in the spectrum range, from low amount (blue), to medium (white) and high (red).

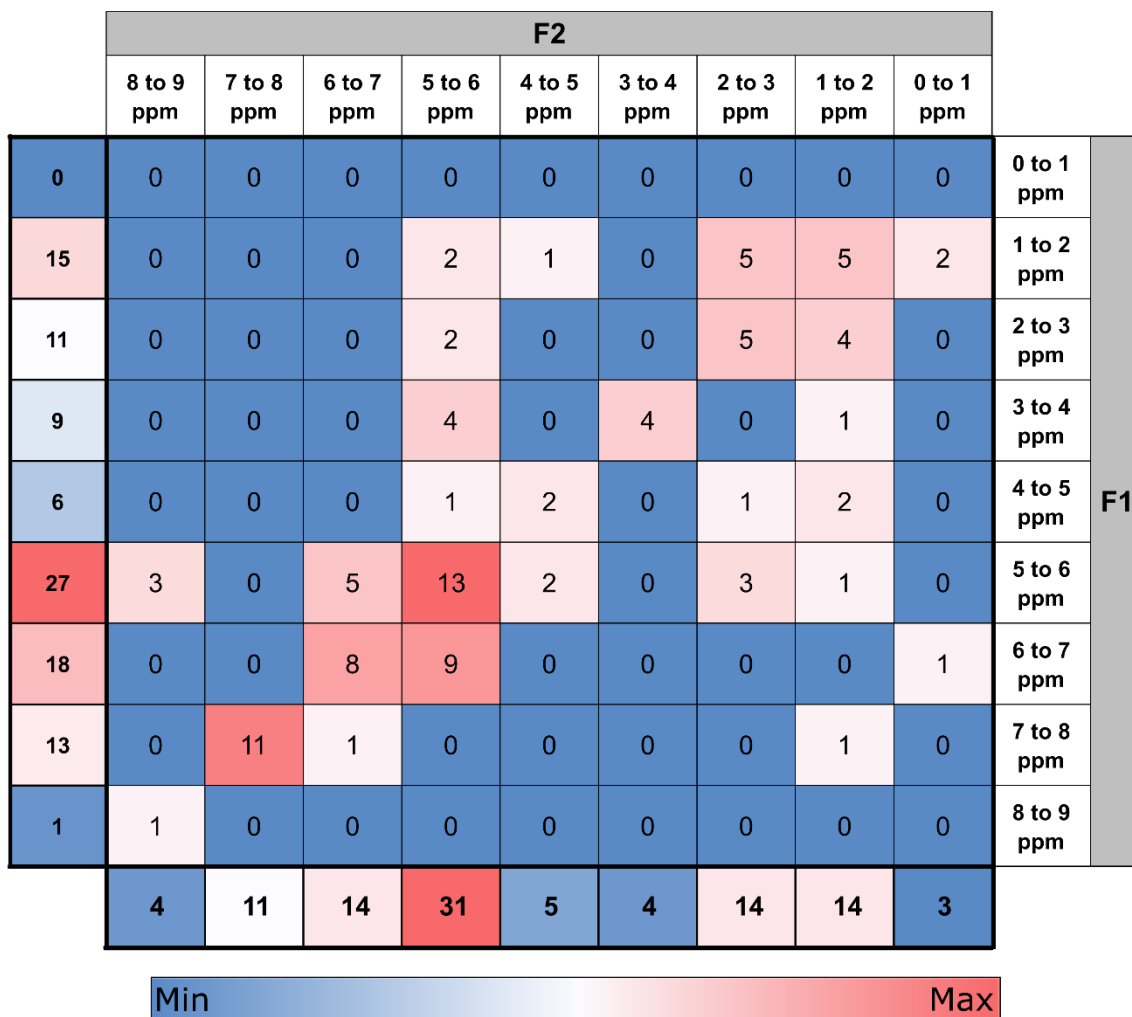

**Figure SI 11 - Spectral distribution of the first 100 VIP in UF COSY.** Color code corresponds to bucket density in the spectrum range, from low amount (blue), to medium (white) and high (red).

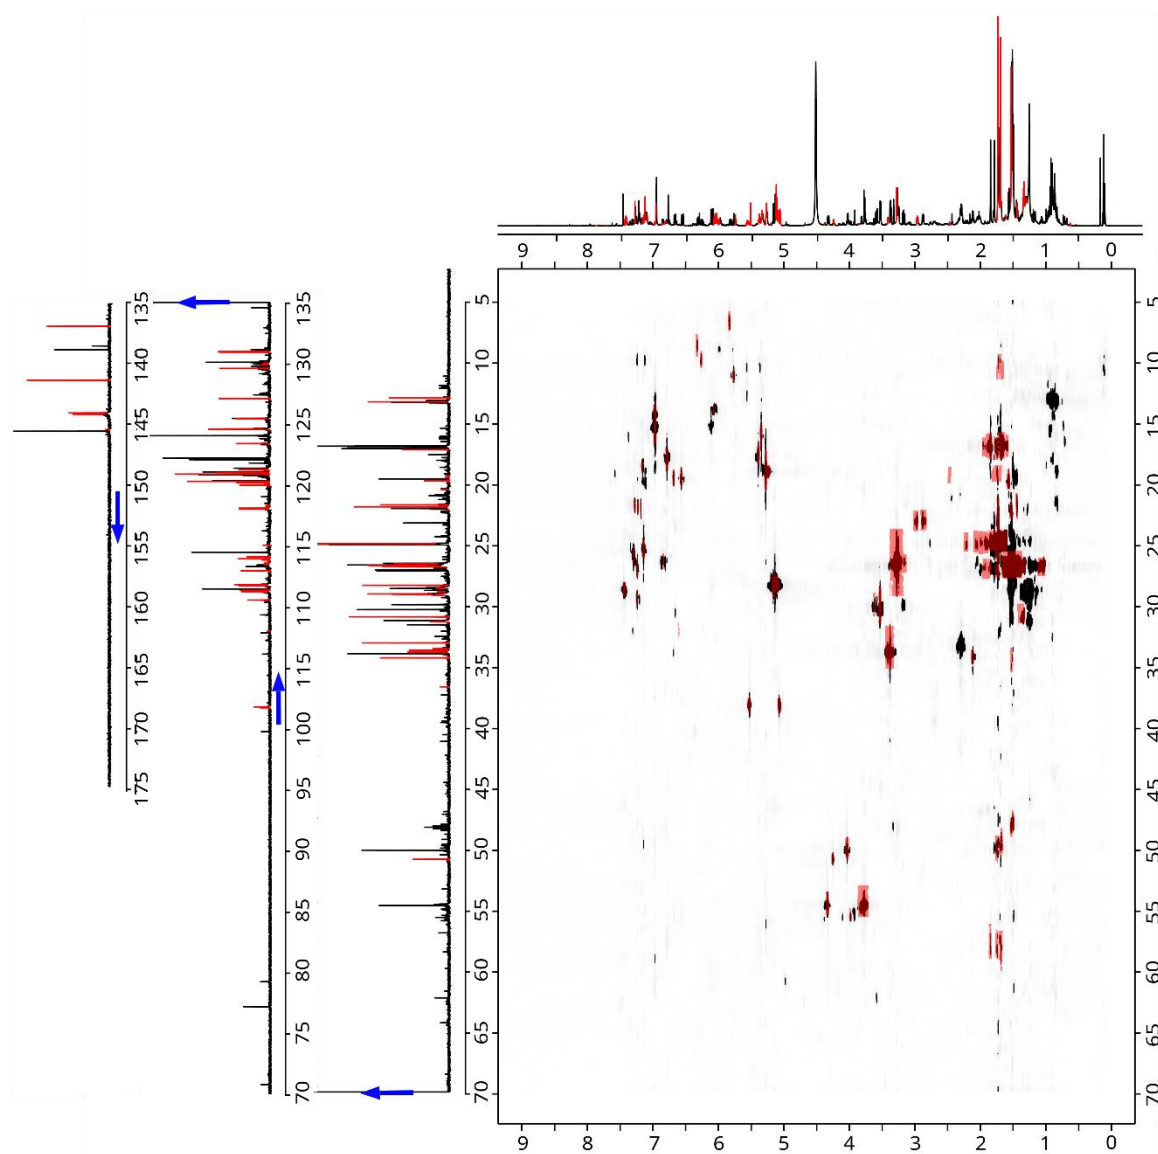

**Figure SI 12 - SYMAPS HSQC with  $^1\text{H}$  and numerically folded  $^{13}\text{C}$  INEPT spectra as projections:** on the top, 1D  $^1\text{H}$  spectrum with their 100 first OPLS-DA VIP buckets in red, on the bottom left, 1D  $^{13}\text{C}$  INEPT numerically folded spectrum with their 100 first OPLS-DA VIP buckets in red, on the bottom right, 2D SYMAPS HSQC spectrum with their 100 first OPLS-DA VIP buckets in red.

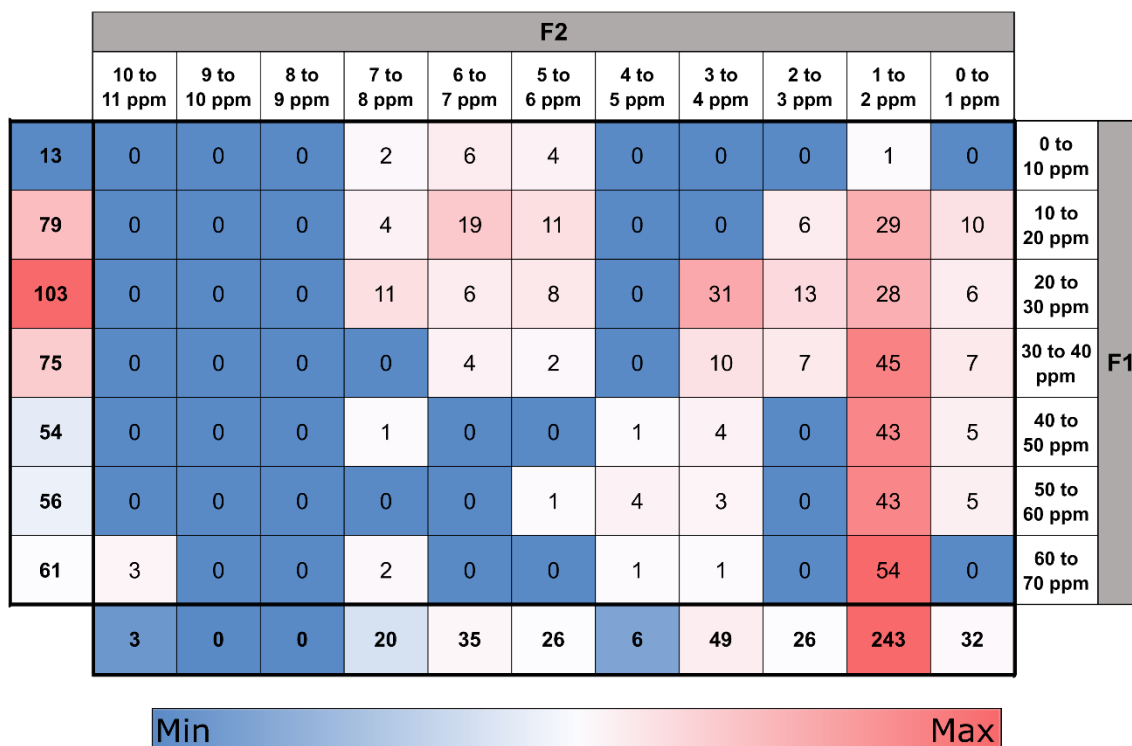

**Figure SI 13 - Spectral distribution of SYMAPS HSQC buckets.** Color code corresponds to bucket density in the spectrum range, from low amount (blue), to medium (white) and high (red).

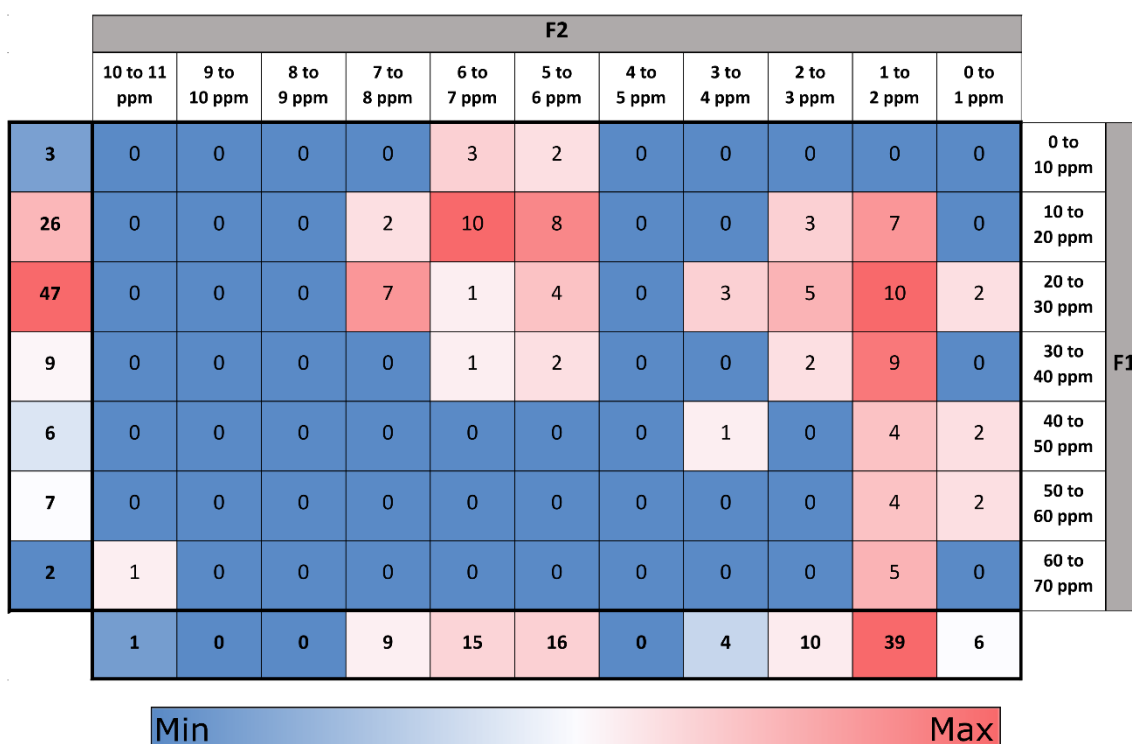

**Figure SI 14 - Spectral distribution of the first 100 VIP in SYMAPS HSQC.** Color code corresponds to bucket density in the spectrum range, from low amount (blue), to medium (white) and high (red).

**Table SI 1 - OPLS-DA model parameters for the four NMR methods** according the tested parameter (medium, time effects): “Medium” lines are the OPLS-DA results for Control (T1 + T2) samples versus Sponge (T1 + T2). Other lines show the effect time on T1 or T2 samples only. “Time” lines are the OPLS-DA results for T1 (Control + Sponge) vs T2 (Control + Sponge). For this study, we concentrate only on the results obtained on Medium lines to compare NMR methods.

|                    |                | OPLS-DA Models Parameters |              |              |             |              |                              |           |              |                              |
|--------------------|----------------|---------------------------|--------------|--------------|-------------|--------------|------------------------------|-----------|--------------|------------------------------|
|                    |                | p1                        |              |              | Permutation |              |                              |           |              |                              |
| Analysis technique | Studied factor | R2X                       | R2Y          | Q2           | n/2000      | Q2           | p                            | n/2000    | R2Y          | p                            |
| <sup>1</sup> H     | <b>Medium</b>  | <b>0.344</b>              | <b>0.842</b> | <b>0.788</b> | <b>0</b>    | <b>0.948</b> | <b>&lt;5.10<sup>-4</sup></b> | <b>0</b>  | <b>0.981</b> | <b>&lt;5.10<sup>-4</sup></b> |
| <sup>1</sup> H     | Medium at T1   | 0.534                     | 0.84         | 0.803        | 4           | 0.897        | 0.002                        | 4         | 0.989        | 0.002                        |
| <sup>1</sup> H     | Medium at T2   | 0.533                     | 0.973        | 0.936        | 47          | 0.984        | 0.0235                       | 47        | 0.998        | 0.0235                       |
| <sup>1</sup> H     | <b>Time</b>    | <b>0.192</b>              | <b>0.838</b> | <b>0.74</b>  | <b>0</b>    | <b>0.954</b> | <b>&lt;5.10<sup>-4</sup></b> | <b>0</b>  | <b>0.983</b> | <b>&lt;5.10<sup>-4</sup></b> |
| <sup>1</sup> H     | Time on Ctrl   | 0.583                     | 0.91         | 0.877        | 10          | 0.958        | 0.005                        | 10        | 0.995        | 0.005                        |
| <sup>1</sup> H     | Time on Sponge | 0.339                     | 0.98         | 0.885        | 6           | 0.964        | 0.003                        | 6         | 0.991        | 0.003                        |
| <b>UF COSY</b>     | <b>Medium</b>  | <b>0.226</b>              | <b>0.832</b> | <b>0.752</b> | <b>0</b>    | <b>0.898</b> | <b>&lt;5.10<sup>-4</sup></b> | <b>0</b>  | <b>0.988</b> | <b>&lt;5.10<sup>-4</sup></b> |
| UF COSY            | Medium at T1   | 0.33                      | 0.926        | 0.835        | 2           | 0.877        | 0.001                        | 2         | 0.977        | 0.001                        |
| UF COSY            | Medium at T2   | 0.349                     | 0.898        | 0.783        | 60          | 0.874        | 0.03                         | 60        | 0.997        | 0.03                         |
| <b>UF COSY</b>     | <b>Time</b>    | <b>0.147</b>              | <b>0.844</b> | <b>0.722</b> | <b>0</b>    | <b>0.909</b> | <b>&lt;5.10<sup>-4</sup></b> | <b>0</b>  | <b>0.984</b> | <b>&lt;5.10<sup>-4</sup></b> |
| UF COSY            | Time on Ctrl   | 0.278                     | 0.947        | 0.812        | 8           | 0.854        | 0.004                        | 13        | 0.99         | 0.0065                       |
| UF COSY            | Time on Sponge | 0.247                     | 0.968        | 0.773        | 6           | 0.831        | 0.003                        | 32        | 0.995        | 0.016                        |
| <sup>13</sup> C    | <b>Medium</b>  | <b>0.236</b>              | <b>0.757</b> | <b>0.644</b> | <b>0</b>    | <b>0.877</b> | <b>&lt;5.10<sup>-4</sup></b> | <b>12</b> | <b>0.991</b> | <b>0.006</b>                 |
| <sup>13</sup> C    | Medium at T1   | 0.357                     | 0.76         | 0.676        | 7           | 0.802        | 0.0035                       | 133       | 0.997        | 0.0665                       |
| <sup>13</sup> C    | Medium at T2   | 0.355                     | 0.93         | 0.854        | 61          | 0.957        | 0.0305                       | 61        | 1            | 0.0305                       |
| <sup>13</sup> C    | <b>Time</b>    | <b>0.308</b>              | <b>0.989</b> | <b>0.885</b> | <b>1</b>    | <b>0.954</b> | <b>&lt;5.10<sup>-4</sup></b> | <b>1</b>  | <b>0.989</b> | <b>&lt;5.10<sup>-4</sup></b> |
| <sup>13</sup> C    | Time on Ctrl   | 0.551                     | 0.895        | 0.834        | 9           | 0.938        | 0.0045                       | 9         | 0.998        | 0.0045                       |
| <sup>13</sup> C    | Time on Sponge | 0.369                     | 0.872        | 0.797        | 6           | 0.951        | 0.003                        | 6         | 0.995        | 0.003                        |
| <b>SYMAPS HSQC</b> | <b>Medium</b>  | <b>0.391</b>              | <b>0.717</b> | <b>0.644</b> | <b>0</b>    | <b>0.911</b> | <b>&lt;5.10<sup>-4</sup></b> | <b>0</b>  | <b>0.983</b> | <b>&lt;5.10<sup>-4</sup></b> |
| SYMAPS HSQC        | Medium at T1   | 0.6                       | 0.871        | 0.839        | 7           | 0.885        | 0.0035                       | 10        | 0.949        | 0.005                        |
| SYMAPS HSQC        | Medium at T2   | 0.53                      | 0.834        | 0.755        | 53          | 0.942        | 0.0265                       | 53        | 0.998        | 0.0265                       |
| <b>SYMAPS HSQC</b> | <b>Time</b>    | <b>0.225</b>              | <b>0.582</b> | <b>0.5</b>   | <b>0</b>    | <b>0.962</b> | <b>&lt;5.10<sup>-4</sup></b> | <b>0</b>  | <b>0.995</b> | <b>&lt;5.10<sup>-4</sup></b> |
| SYMAPS HSQC        | Time on Ctrl   | 0.551                     | 0.895        | 0.834        | 13          | 0.938        | 0.0065                       | 13        | 0.998        | 0.0065                       |
| SYMAPS HSQC        | Time on Sponge | 0.369                     | 0.872        | 0.797        | 4           | 0.967        | 0.002                        | 4         | 0.992        | 0.002                        |

Table SI 2 - 100 first <sup>1</sup>H VIP buckets from OPLS-DA (Part 1/3)

| <sup>1</sup> H VIP Ranking | Bucket   | V1    | V2    | Center [ppm] | Min [ppm] | Max [ppm] | Potential correspondence in F1 in UF COSY | Potential correspondence in F2 in UF COSY | Potential correspondence in F2 in HSQC |
|----------------------------|----------|-------|-------|--------------|-----------|-----------|-------------------------------------------|-------------------------------------------|----------------------------------------|
| 1                          | B7_2997  | 1.651 | 0.239 | 7.300        | 7.293     | 7.306     | Yes                                       | Yes                                       | Yes                                    |
| 2                          | B12_1959 | 1.626 | 0.182 | 12.196       | 12.187    | 12.205    | No                                        | No                                        | No                                     |
| 3                          | B7_4380  | 1.611 | 0.439 | 7.438        | 7.431     | 7.445     | Yes                                       | Yes                                       | Yes                                    |
| 4                          | B5_1073  | 1.593 | 0.467 | 5.107        | 5.103     | 5.112     | Yes                                       | Yes                                       | Yes                                    |
| 5                          | B6_0605  | 1.592 | 0.467 | 6.060        | 6.058     | 6.063     | Yes                                       | Yes                                       | Yes                                    |
| 6                          | B6_3701  | 1.591 | 0.391 | 6.370        | 6.368     | 6.372     | No                                        | Yes                                       | No                                     |
| 7                          | B7_1593  | 1.587 | 0.497 | 7.159        | 7.154     | 7.165     | Yes                                       | Yes                                       | Yes                                    |
| 8                          | B6_9771  | 1.585 | 0.479 | 6.977        | 6.973     | 6.981     | Yes                                       | Yes                                       | No                                     |
| 9                          | B4_3958  | 1.579 | 0.377 | 4.396        | 4.393     | 4.399     | No                                        | No                                        | No                                     |
| 10                         | B3_2907  | 1.577 | 0.506 | 3.291        | 3.279     | 3.302     | Yes                                       | Yes                                       | Yes                                    |
| 11                         | B7_5404  | 1.572 | 0.352 | 7.540        | 7.536     | 7.545     | No                                        | No                                        | No                                     |
| 12                         | B7_8954  | 1.569 | 0.406 | 7.895        | 7.889     | 7.902     | No                                        | No                                        | No                                     |
| 13                         | B6_4305  | 1.566 | 0.438 | 6.430        | 6.429     | 6.432     | No                                        | Yes                                       | No                                     |
| 14                         | B5_2933  | 1.561 | 0.522 | 5.293        | 5.285     | 5.301     | Yes                                       | Yes                                       | Yes                                    |
| 15                         | B6_6041  | 1.559 | 0.419 | 6.604        | 6.602     | 6.606     | Yes                                       | Yes                                       | Yes                                    |
| 16                         | B5_0751  | 1.559 | 0.515 | 5.075        | 5.071     | 5.079     | Yes                                       | Yes                                       | Yes                                    |
| 17                         | B6_0410  | 1.557 | 0.556 | 6.041        | 6.034     | 6.048     | Yes                                       | Yes                                       | Yes                                    |
| 18                         | B10_0666 | 1.555 | 0.526 | 10.067       | 10.058    | 10.075    | No                                        | No                                        | Yes                                    |
| 19                         | B6_8944  | 1.554 | 0.450 | 6.894        | 6.889     | 6.900     | No                                        | Yes                                       | No                                     |
| 20                         | B7_1698  | 1.553 | 0.560 | 7.170        | 7.165     | 7.175     | Yes                                       | Yes                                       | Yes                                    |
| 21                         | B3_4237  | 1.551 | 0.537 | 3.424        | 3.414     | 3.433     | Yes                                       | Yes                                       | No                                     |
| 22                         | B5_0607  | 1.551 | 0.512 | 5.061        | 5.050     | 5.071     | Yes                                       | Yes                                       | Yes                                    |
| 23                         | B7_5636  | 1.550 | 0.046 | 7.564        | 7.559     | 7.569     | No                                        | No                                        | No                                     |
| 24                         | B5_9981  | 1.546 | 0.488 | 5.998        | 5.995     | 6.001     | Yes                                       | Yes                                       | Yes                                    |
| 25                         | B7_7377  | 1.540 | 0.406 | 7.738        | 7.736     | 7.739     | No                                        | No                                        | No                                     |
| 26                         | B5_3480  | 1.538 | 0.587 | 5.348        | 5.342     | 5.354     | Yes                                       | Yes                                       | No                                     |
| 27                         | B2_5900  | 1.537 | 0.446 | 2.590        | 2.584     | 2.596     | No                                        | Yes                                       | No                                     |
| 28                         | B6_0304  | 1.535 | 0.550 | 6.030        | 6.027     | 6.034     | Yes                                       | Yes                                       | Yes                                    |
| 29                         | B5_0959  | 1.535 | 0.593 | 5.096        | 5.089     | 5.103     | Yes                                       | Yes                                       | Yes                                    |
| 30                         | B5_1211  | 1.532 | 0.595 | 5.121        | 5.115     | 5.127     | Yes                                       | Yes                                       | Yes                                    |
| 31                         | B7_1798  | 1.529 | 0.609 | 7.180        | 7.175     | 7.185     | Yes                                       | Yes                                       | Yes                                    |
| 32                         | B5_0812  | 1.528 | 0.449 | 5.081        | 5.079     | 5.083     | Yes                                       | Yes                                       | Yes                                    |
| 33                         | B7_2179  | 1.528 | 0.510 | 7.218        | 7.216     | 7.220     | Yes                                       | Yes                                       | No                                     |
| 34                         | B6_0852  | 1.526 | 0.592 | 6.085        | 6.082     | 6.088     | Yes                                       | Yes                                       | Yes                                    |
| 35                         | B5_5211  | 1.525 | 0.562 | 5.521        | 5.511     | 5.531     | Yes                                       | Yes                                       | Yes                                    |
| 36                         | B5_5333  | 1.524 | 0.529 | 5.533        | 5.531     | 5.535     | Yes                                       | Yes                                       | Yes                                    |
| 37                         | B6_0683  | 1.519 | 0.621 | 6.068        | 6.063     | 6.073     | Yes                                       | Yes                                       | Yes                                    |
| 38                         | B5_5422  | 1.519 | 0.596 | 5.542        | 5.540     | 5.545     | Yes                                       | Yes                                       | Yes                                    |
| 39                         | B6_0061  | 1.517 | 0.605 | 6.006        | 6.001     | 6.011     | Yes                                       | Yes                                       | Yes                                    |



|    |         |       |       |       |       |       |     |     |     |
|----|---------|-------|-------|-------|-------|-------|-----|-----|-----|
| 40 | B1_5327 | 1.515 | 0.596 | 1.533 | 1.527 | 1.538 | Yes | Yes | Yes |
| 41 | B7_7332 | 1.515 | 0.548 | 7.733 | 7.730 | 7.736 | No  | No  | No  |
| 42 | B7_7459 | 1.513 | 0.596 | 7.746 | 7.743 | 7.748 | No  | No  | No  |

**Table S1 3 - 100 first <sup>1</sup>H VIP buckets from OPLS-DA (Part 2/3)**

| <sup>1</sup> H VIP Ranking | Bucket   | V1    | V2    | Center [ppm] | Min [ppm] | Max [ppm] | Potential correspondence in F1 in UF COSY | Potential correspondence in F2 in UF COSY | Potential correspondence in F2 in HSQC |
|----------------------------|----------|-------|-------|--------------|-----------|-----------|-------------------------------------------|-------------------------------------------|----------------------------------------|
| 43                         | B6_8274  | 1.512 | 0.466 | 6.827        | 6.822     | 6.833     | No                                        | Yes                                       | Yes                                    |
| 44                         | B6_5057  | 1.511 | 0.439 | 6.506        | 6.504     | 6.507     | Yes                                       | Yes                                       | No                                     |
| 45                         | B2_4699  | 1.505 | 0.626 | 2.470        | 2.459     | 2.481     | Yes                                       | Yes                                       | Yes                                    |
| 46                         | B5_2790  | 1.501 | 0.607 | 5.279        | 5.273     | 5.285     | Yes                                       | Yes                                       | Yes                                    |
| 47                         | B1_3410  | 1.500 | 0.642 | 1.341        | 1.338     | 1.344     | Yes                                       | Yes                                       | Yes                                    |
| 48                         | B1_3349  | 1.500 | 0.635 | 1.335        | 1.332     | 1.338     | Yes                                       | Yes                                       | Yes                                    |
| 49                         | B7_1063  | 1.499 | 0.651 | 7.106        | 7.101     | 7.112     | No                                        | Yes                                       | Yes                                    |
| 50                         | B5_1325  | 1.499 | 0.643 | 5.132        | 5.127     | 5.138     | Yes                                       | Yes                                       | Yes                                    |
| 51                         | B5_5699  | 1.499 | 0.631 | 5.570        | 5.564     | 5.576     | Yes                                       | Yes                                       | No                                     |
| 52                         | B5_3620  | 1.498 | 0.642 | 5.362        | 5.354     | 5.370     | Yes                                       | Yes                                       | No                                     |
| 53                         | B5_5806  | 1.497 | 0.629 | 5.581        | 5.576     | 5.586     | Yes                                       | Yes                                       | No                                     |
| 54                         | B-0_3424 | 1.495 | 0.552 | -0.342       | -0.346    | -0.339    | No                                        | No                                        | No                                     |
| 55                         | B7_0661  | 1.491 | 0.608 | 7.066        | 7.061     | 7.072     | No                                        | Yes                                       | No                                     |
| 56                         | B5_4040  | 1.490 | 0.664 | 5.404        | 5.398     | 5.410     | Yes                                       | Yes                                       | No                                     |
| 57                         | B7_4522  | 1.487 | 0.648 | 7.452        | 7.445     | 7.459     | Yes                                       | Yes                                       | Yes                                    |
| 58                         | B5_2158  | 1.486 | 0.668 | 5.216        | 5.213     | 5.219     | Yes                                       | Yes                                       | No                                     |
| 59                         | B10_0452 | 1.486 | 0.642 | 10.045       | 10.039    | 10.051    | No                                        | No                                        | Yes                                    |
| 60                         | B5_5595  | 1.485 | 0.611 | 5.560        | 5.555     | 5.564     | Yes                                       | Yes                                       | No                                     |
| 61                         | B1_7432  | 1.485 | 0.662 | 1.743        | 1.727     | 1.759     | Yes                                       | Yes                                       | Yes                                    |
| 62                         | B10_1628 | 1.481 | 0.634 | 10.163       | 10.136    | 10.189    | No                                        | No                                        | No                                     |
| 63                         | B5_5498  | 1.479 | 0.624 | 5.550        | 5.545     | 5.555     | Yes                                       | Yes                                       | Yes                                    |
| 64                         | B7_4231  | 1.477 | 0.689 | 7.423        | 7.415     | 7.431     | Yes                                       | Yes                                       | No                                     |
| 65                         | B1_5253  | 1.471 | 0.673 | 1.525        | 1.523     | 1.527     | Yes                                       | Yes                                       | Yes                                    |
| 66                         | B7_8832  | 1.471 | 0.433 | 7.883        | 7.878     | 7.889     | No                                        | No                                        | No                                     |
| 67                         | B1_6921  | 1.470 | 0.663 | 1.692        | 1.685     | 1.700     | Yes                                       | Yes                                       | Yes                                    |
| 68                         | B2_9812  | 1.469 | 0.673 | 2.981        | 2.975     | 2.987     | Yes                                       | Yes                                       | Yes                                    |
| 69                         | B5_0862  | 1.468 | 0.670 | 5.086        | 5.083     | 5.089     | Yes                                       | Yes                                       | Yes                                    |
| 70                         | B6_0546  | 1.468 | 0.703 | 6.055        | 6.051     | 6.058     | Yes                                       | Yes                                       | Yes                                    |
| 71                         | B1_3268  | 1.467 | 0.677 | 1.327        | 1.322     | 1.332     | Yes                                       | Yes                                       | Yes                                    |
| 72                         | B6_8366  | 1.465 | 0.485 | 6.837        | 6.833     | 6.840     | No                                        | No                                        | Yes                                    |
| 73                         | B6_0793  | 1.461 | 0.698 | 6.079        | 6.076     | 6.082     | Yes                                       | Yes                                       | Yes                                    |
| 74                         | B6_9982  | 1.460 | 0.667 | 6.998        | 6.989     | 7.008     | Yes                                       | Yes                                       | No                                     |
| 75                         | B2_9691  | 1.459 | 0.677 | 2.969        | 2.963     | 2.975     | Yes                                       | Yes                                       | Yes                                    |
| 76                         | B-0_3297 | 1.459 | 0.531 | -0.330       | -0.339    | -0.320    | No                                        | No                                        | No                                     |
| 77                         | B5_7574  | 1.458 | 0.674 | 5.757        | 5.752     | 5.762     | Yes                                       | Yes                                       | Yes                                    |
| 78                         | B3_4054  | 1.456 | 0.663 | 3.405        | 3.397     | 3.414     | Yes                                       | Yes                                       | No                                     |
| 79                         | B4_2482  | 1.455 | 0.696 | 4.248        | 4.243     | 4.254     | Yes                                       | Yes                                       | No                                     |
| 80                         | B6_8452  | 1.455 | 0.523 | 6.845        | 6.840     | 6.850     | No                                        | No                                        | Yes                                    |
| 81                         | B5_5068  | 1.454 | 0.646 | 5.507        | 5.503     | 5.511     | Yes                                       | Yes                                       | No                                     |

|    |          |       |       |        |        |        |     |     |     |
|----|----------|-------|-------|--------|--------|--------|-----|-----|-----|
| 82 | B1_4388  | 1.453 | 0.703 | 1.439  | 1.435  | 1.442  | Yes | Yes | Yes |
| 83 | B11_8978 | 1.453 | 0.391 | 11.898 | 11.886 | 11.909 | No  | No  | No  |
| 84 | B11_9453 | 1.453 | 0.398 | 11.945 | 11.935 | 11.955 | No  | No  | No  |

**Table SI 4 - 100 first <sup>1</sup>H VIP buckets from OPLS-DA (Part 3/3)**

| <sup>1</sup> H VIP Ranking | Bucket  | V1    | V2    | Center [ppm] | Min [ppm] | Max [ppm] | Potential correspondence in F1 in UF COSY | Potential correspondence in F2 in UF COSY | Potential correspondence in F2 in HSQC |
|----------------------------|---------|-------|-------|--------------|-----------|-----------|-------------------------------------------|-------------------------------------------|----------------------------------------|
| 85                         | B5_5376 | 1.452 | 0.619 | 5.538        | 5.535     | 5.540     | Yes                                       | Yes                                       | Yes                                    |
| 86                         | B0_6249 | 1.452 | 0.677 | 0.625        | 0.614     | 0.636     | No                                        | No                                        | No                                     |
| 87                         | B5_3913 | 1.451 | 0.727 | 5.391        | 5.385     | 5.398     | Yes                                       | Yes                                       | No                                     |
| 88                         | B6_6852 | 1.451 | 0.595 | 6.685        | 6.682     | 6.689     | Yes                                       | Yes                                       | Yes                                    |
| 89                         | B1_6594 | 1.450 | 0.670 | 1.659        | 1.653     | 1.666     | Yes                                       | Yes                                       | Yes                                    |
| 90                         | B1_3470 | 1.448 | 0.716 | 1.347        | 1.344     | 1.350     | Yes                                       | Yes                                       | Yes                                    |
| 91                         | B3_8614 | 1.448 | 0.617 | 3.861        | 3.857     | 3.865     | No                                        | Yes                                       | No                                     |
| 92                         | B1_7036 | 1.447 | 0.722 | 1.704        | 1.700     | 1.708     | Yes                                       | Yes                                       | Yes                                    |
| 93                         | B1_2969 | 1.445 | 0.711 | 1.297        | 1.292     | 1.302     | No                                        | Yes                                       | Yes                                    |
| 94                         | B1_6109 | 1.445 | 0.734 | 1.611        | 1.605     | 1.617     | No                                        | Yes                                       | Yes                                    |
| 95                         | B7_1467 | 1.443 | 0.724 | 7.147        | 7.140     | 7.154     | Yes                                       | Yes                                       | No                                     |
| 96                         | B6_8849 | 1.443 | 0.640 | 6.885        | 6.881     | 6.889     | No                                        | No                                        | No                                     |
| 97                         | B5_5910 | 1.442 | 0.709 | 5.591        | 5.586     | 5.596     | Yes                                       | Yes                                       | No                                     |
| 98                         | B4_7440 | 1.441 | 0.650 | 4.744        | 4.740     | 4.748     | No                                        | No                                        | No                                     |
| 99                         | B1_2871 | 1.439 | 0.722 | 1.287        | 1.282     | 1.292     | No                                        | Yes                                       | Yes                                    |
| 100                        | B5_4208 | 1.439 | 0.737 | 5.421        | 5.417     | 5.425     | Yes                                       | Yes                                       | No                                     |

Table SI 5 - 100 first <sup>13</sup>C VIP buckets from OPLS-DA (Part 1/3)

| <sup>13</sup> C VIP Ranking | Bucket    | V1    | V2    | Center [ppm] | Min [ppm] | Max [ppm] | Potential Correspondence in F1 |
|-----------------------------|-----------|-------|-------|--------------|-----------|-----------|--------------------------------|
| 1                           | B113_7829 | 1.821 | 0.568 | 113.783      | 113.748   | 113.818   | Yes                            |
| 2                           | B119_9937 | 1.806 | 0.654 | 119.994      | 119.962   | 120.026   | Yes                            |
| 3                           | B143_7794 | 1.804 | 0.672 | 143.779      | 143.757   | 143.801   | Yes                            |
| 4                           | B107_8090 | 1.795 | 0.614 | 107.809      | 107.782   | 107.836   | Yes                            |
| 5                           | B111_5956 | 1.792 | 0.585 | 111.596      | 111.572   | 111.620   | Yes                            |
| 6                           | B28_9028  | 1.789 | 0.547 | 28.903       | 28.877    | 28.929    | Yes                            |
| 7                           | B129_6858 | 1.763 | 0.637 | 129.686      | 129.670   | 129.701   | Yes                            |
| 8                           | B117_8638 | 1.762 | 0.717 | 117.864      | 117.825   | 117.903   | Yes                            |
| 9                           | B111_1731 | 1.761 | 0.715 | 111.173      | 111.144   | 111.203   | Yes                            |
| 10                          | B28_8019  | 1.749 | 0.674 | 28.802       | 28.782    | 28.822    | Yes                            |
| 11                          | B129_8164 | 1.746 | 0.642 | 129.816      | 129.789   | 129.844   | Yes                            |
| 12                          | B118_1131 | 1.741 | 0.419 | 118.113      | 118.090   | 118.136   | Yes                            |
| 13                          | B113_7300 | 1.723 | 0.279 | 113.730      | 113.712   | 113.748   | Yes                            |
| 14                          | B143_8644 | 1.710 | 0.734 | 143.864      | 143.854   | 143.875   | Yes                            |
| 15                          | B27_5577  | 1.704 | 0.603 | 27.558       | 27.541    | 27.575    | Yes                            |
| 16                          | B117_9304 | 1.699 | 0.754 | 117.930      | 117.903   | 117.958   | Yes                            |
| 17                          | B20_3724  | 1.699 | 0.608 | 20.372       | 20.356    | 20.389    | Yes                            |
| 18                          | B101_6241 | 1.698 | 0.681 | 101.624      | 101.576   | 101.672   | Yes                            |
| 19                          | B113_6743 | 1.697 | 0.583 | 113.674      | 113.637   | 113.712   | Yes                            |
| 20                          | B13_2898  | 1.692 | 0.750 | 13.290       | 13.246    | 13.334    | Yes                            |
| 21                          | B26_6971  | 1.681 | 0.781 | 26.697       | 26.679    | 26.716    | Yes                            |
| 22                          | B28_8418  | 1.672 | 0.740 | 28.842       | 28.822    | 28.862    | Yes                            |
| 23                          | B36_5855  | 1.671 | 0.661 | 36.585       | 36.567    | 36.604    | Yes                            |
| 24                          | B112_7543 | 1.667 | 0.772 | 112.754      | 112.686   | 112.823   | Yes                            |
| 25                          | B33_5858  | 1.665 | 0.829 | 33.586       | 33.562    | 33.609    | Yes                            |
| 26                          | B70_5963  | 1.662 | 0.685 | 70.596       | 70.578    | 70.614    | No                             |
| 27                          | B111_6413 | 1.657 | 0.823 | 111.641      | 111.620   | 111.663   | Yes                            |
| 28                          | B32_9499  | 1.650 | 0.820 | 32.950       | 32.893    | 33.007    | Yes                            |
| 29                          | B28_5689  | 1.640 | 0.766 | 28.569       | 28.540    | 28.598    | Yes                            |
| 30                          | B113_4295 | 1.638 | 0.356 | 113.430      | 113.395   | 113.464   | Yes                            |
| 31                          | B30_8279  | 1.635 | 0.857 | 30.828       | 30.783    | 30.872    | Yes                            |
| 32                          | B31_2518  | 1.628 | 0.813 | 31.252       | 31.195    | 31.309    | Yes                            |
| 33                          | B123_2084 | 1.625 | 0.805 | 123.208      | 123.173   | 123.244   | Yes                            |
| 34                          | B19_2220  | 1.623 | 0.617 | 19.222       | 19.206    | 19.239    | Yes                            |
| 35                          | B26_6268  | 1.622 | 0.805 | 26.627       | 26.608    | 26.646    | Yes                            |
| 36                          | B34_1764  | 1.605 | 0.843 | 34.176       | 34.122    | 34.231    | Yes                            |
| 37                          | B26_7396  | 1.605 | 0.823 | 26.740       | 26.716    | 26.763    | Yes                            |
| 38                          | B28_6188  | 1.584 | 0.860 | 28.619       | 28.598    | 28.639    | Yes                            |
| 39                          | B129_3957 | 1.583 | 0.885 | 129.396      | 129.353   | 129.438   | Yes                            |
| 40                          | B113_8888 | 1.583 | 0.633 | 113.889      | 113.860   | 113.917   | Yes                            |
| 41                          | B120_8366 | 1.582 | 0.878 | 120.837      | 120.803   | 120.870   | Yes                            |
| 42                          | B136_6586 | 1.581 | 0.863 | 136.659      | 136.601   | 136.717   | Yes                            |

Table SI 6 - 100 first <sup>13</sup>C VIP buckets from OPLS-DA (Part 2/3)

| <sup>13</sup> C VIP Ranking | Bucket    | V1    | V2    | Center [ppm] | Min [ppm] | Max [ppm] | Potential Correspondence in F1 |
|-----------------------------|-----------|-------|-------|--------------|-----------|-----------|--------------------------------|
| 43                          | B141_0771 | 1.572 | 0.905 | 141.077      | 141.021   | 141.134   | Yes                            |
| 44                          | B18_0579  | 1.566 | 0.707 | 18.058       | 18.017    | 18.099    | Yes                            |
| 45                          | B28_4757  | 1.566 | 0.888 | 28.476       | 28.461    | 28.490    | Yes                            |
| 46                          | B126_9110 | 1.566 | 0.825 | 126.911      | 126.863   | 126.959   | No                             |
| 47                          | B120_1204 | 1.562 | 0.899 | 120.120      | 120.088   | 120.152   | Yes                            |
| 48                          | B13_1803  | 1.561 | 0.909 | 13.180       | 13.155    | 13.206    | No                             |
| 49                          | B119_7879 | 1.561 | 0.867 | 119.788      | 119.730   | 119.846   | Yes                            |
| 50                          | B118_1616 | 1.560 | 0.588 | 118.162      | 118.136   | 118.187   | Yes                            |
| 51                          | B59_6992  | 1.559 | 0.289 | 59.699       | 59.677    | 59.721    | Yes                            |
| 52                          | B124_3739 | 1.555 | 0.891 | 124.374      | 124.324   | 124.424   | No                             |
| 53                          | B28_2444  | 1.552 | 0.914 | 28.244       | 28.208    | 28.280    | Yes                            |
| 54                          | B28_9483  | 1.550 | 0.804 | 28.948       | 28.929    | 28.968    | Yes                            |
| 55                          | B19_3796  | 1.527 | 0.715 | 19.380       | 19.354    | 19.405    | Yes                            |
| 56                          | B21_9970  | 1.526 | 0.889 | 21.997       | 21.967    | 22.027    | Yes                            |
| 57                          | B21_7945  | 1.525 | 0.928 | 21.794       | 21.758    | 21.831    | Yes                            |
| 58                          | B145_1500 | 1.522 | 0.520 | 145.150      | 145.109   | 145.191   | No                             |
| 59                          | B110_3815 | 1.522 | 0.878 | 110.381      | 110.352   | 110.411   | Yes                            |
| 60                          | B125_2562 | 1.519 | 0.781 | 125.256      | 125.231   | 125.282   | Yes                            |
| 61                          | B113_9521 | 1.510 | 0.756 | 113.952      | 113.917   | 113.987   | Yes                            |
| 62                          | B28_6892  | 1.509 | 0.857 | 28.689       | 28.658    | 28.721    | Yes                            |
| 63                          | B24_8313  | 1.508 | 0.920 | 24.831       | 24.808    | 24.855    | Yes                            |
| 64                          | B111_5450 | 1.505 | 0.965 | 111.545      | 111.518   | 111.572   | Yes                            |
| 65                          | B12_8547  | 1.491 | 0.926 | 12.855       | 12.809    | 12.901    | No                             |
| 66                          | B130_7097 | 1.489 | 0.888 | 130.710      | 130.674   | 130.746   | Yes                            |
| 67                          | B143_8842 | 1.488 | 0.974 | 143.884      | 143.875   | 143.894   | Yes                            |
| 68                          | B111_0725 | 1.479 | 0.958 | 111.073      | 111.043   | 111.102   | Yes                            |
| 69                          | B121_0437 | 1.472 | 0.930 | 121.044      | 120.999   | 121.088   | Yes                            |
| 70                          | B111_1227 | 1.470 | 0.786 | 111.123      | 111.102   | 111.144   | Yes                            |
| 71                          | B113_3233 | 1.467 | 0.737 | 113.323      | 113.291   | 113.355   | Yes                            |
| 72                          | B50_7373  | 1.466 | 0.947 | 50.737       | 50.675    | 50.799    | Yes                            |
| 73                          | B33_4582  | 1.464 | 0.991 | 33.458       | 33.432    | 33.485    | Yes                            |
| 74                          | B44_4838  | 1.457 | 0.263 | 44.484       | 44.467    | 44.501    | No                             |
| 75                          | B33_7496  | 1.456 | 0.968 | 33.750       | 33.719    | 33.780    | Yes                            |
| 76                          | B101_5378 | 1.446 | 0.600 | 101.538      | 101.500   | 101.576   | Yes                            |
| 77                          | B26_4658  | 1.446 | 0.869 | 26.466       | 26.455    | 26.477    | Yes                            |
| 78                          | B22_0804  | 1.440 | 0.735 | 22.080       | 22.056    | 22.105    | Yes                            |
| 79                          | B29_0139  | 1.435 | 1.001 | 29.014       | 28.968    | 29.060    | Yes                            |
| 80                          | B119_8680 | 1.429 | 0.687 | 119.868      | 119.846   | 119.890   | Yes                            |
| 81                          | B130_7794 | 1.426 | 0.956 | 130.779      | 130.746   | 130.813   | Yes                            |
| 82                          | B124_4408 | 1.424 | 1.018 | 124.441      | 124.424   | 124.458   | No                             |
| 83                          | B19_6859  | 1.421 | 0.998 | 19.686       | 19.622    | 19.750    | Yes                            |
| 84                          | B17_1152  | 1.420 | 0.957 | 17.115       | 17.085    | 17.146    | Yes                            |

Table SI 7 - 100 first <sup>13</sup>C VIP buckets from OPLS-DA (Part 3/3)

| <sup>13</sup> C VIP Ranking | Bucket    | V1    | V2    | Center [ppm] | Min [ppm] | Max [ppm] | Potential Correspondence in F1 |
|-----------------------------|-----------|-------|-------|--------------|-----------|-----------|--------------------------------|
| 85                          | B21_6387  | 1.418 | 1.023 | 21.639       | 21.613    | 21.665    | Yes                            |
| 86                          | B143_8394 | 1.415 | 0.959 | 143.839      | 143.825   | 143.854   | Yes                            |
| 87                          | B28_6485  | 1.413 | 0.969 | 28.649       | 28.639    | 28.658    | Yes                            |
| 88                          | B120_7122 | 1.399 | 1.012 | 120.712      | 120.679   | 120.745   | Yes                            |
| 89                          | B121_1191 | 1.388 | 0.946 | 121.119      | 121.088   | 121.150   | Yes                            |
| 90                          | B29_0763  | 1.371 | 1.042 | 29.076       | 29.060    | 29.093    | Yes                            |
| 91                          | B114_8669 | 1.370 | 0.623 | 114.867      | 114.833   | 114.900   | Yes                            |
| 92                          | B58_1908  | 1.366 | 0.444 | 58.191       | 58.171    | 58.211    | Yes                            |
| 93                          | B26_6623  | 1.348 | 1.046 | 26.662       | 26.646    | 26.679    | Yes                            |
| 94                          | B125_2064 | 1.334 | 0.663 | 125.206      | 125.182   | 125.231   | Yes                            |
| 95                          | B27_2848  | 1.326 | 0.961 | 27.285       | 27.249    | 27.321    | Yes                            |
| 96                          | B38_7969  | 1.322 | 0.618 | 38.797       | 38.751    | 38.843    | Yes                            |
| 97                          | B26_5584  | 1.316 | 1.088 | 26.558       | 26.521    | 26.596    | Yes                            |
| 98                          | B55_6512  | 1.312 | 0.886 | 55.651       | 55.628    | 55.674    | No                             |
| 99                          | B26_4991  | 1.304 | 1.060 | 26.499       | 26.477    | 26.521    | Yes                            |
| 100                         | B29_2522  | 1.290 | 1.001 | 29.252       | 29.196    | 29.308    | Yes                            |

Table SI 8 - 100 first UF COSY VIP buckets from OPLS-DA (Part 1/3)

| UF COSY VIP Ranking | Nom    | V1    | V2    | Center F1 [ppm] | Start <sup>1</sup> H F1 [ppm] | End <sup>1</sup> H F1 [ppm] | Center F2 [ppm] | Start <sup>1</sup> H F2 [ppm] | End <sup>1</sup> H F2 [ppm] | Potential correspondence in F1 | Potential correspondence in F2 |
|---------------------|--------|-------|-------|-----------------|-------------------------------|-----------------------------|-----------------|-------------------------------|-----------------------------|--------------------------------|--------------------------------|
| 1                   | B_1013 | 2.022 | 0.448 | 7.447           | 7.455                         | 7.434                       | 7.456           | 7.541                         | 7.370                       | Yes                            | Yes                            |
| 2                   | B_0998 | 1.987 | 0.550 | 7.145           | 7.184                         | 7.114                       | 7.434           | 7.526                         | 7.334                       | Yes                            | Yes                            |
| 3                   | B_1007 | 1.960 | 0.580 | 7.437           | 7.477                         | 7.400                       | 7.176           | 7.266                         | 7.093                       | Yes                            | Yes                            |
| 4                   | B_0016 | 1.944 | 0.728 | 1.338           | 1.368                         | 1.307                       | 1.335           | 1.405                         | 1.261                       | Yes                            | Yes                            |
| 5                   | B_1004 | 1.940 | 0.609 | 7.279           | 7.302                         | 7.256                       | 7.084           | 7.148                         | 7.028                       | Yes                            | Yes                            |
| 6                   | B_0461 | 1.934 | 0.666 | 5.061           | 5.095                         | 5.035                       | 5.088           | 5.176                         | 4.996                       | Yes                            | Yes                            |
| 7                   | B_0981 | 1.933 | 0.658 | 7.016           | 7.035                         | 6.999                       | 7.014           | 7.119                         | 6.902                       | Yes                            | Yes                            |
| 8                   | B_0627 | 1.919 | 0.700 | 1.705           | 1.733                         | 1.675                       | 5.644           | 5.793                         | 5.493                       | Yes                            | Yes                            |
| 9                   | B_0469 | 1.918 | 0.788 | 5.764           | 5.810                         | 5.715                       | 6.625           | 6.804                         | 6.439                       | Yes                            | Yes                            |
| 10                  | B_1003 | 1.899 | 0.738 | 7.224           | 7.249                         | 7.201                       | 7.084           | 7.151                         | 7.014                       | Yes                            | Yes                            |
| 11                  | B_0542 | 1.897 | 0.690 | 6.071           | 6.087                         | 6.052                       | 6.086           | 6.172                         | 6.002                       | Yes                            | Yes                            |
| 12                  | B_0468 | 1.894 | 0.848 | 5.561           | 5.609                         | 5.514                       | 5.973           | 6.126                         | 5.818                       | Yes                            | Yes                            |
| 13                  | B_0486 | 1.891 | 0.422 | 5.779           | 5.793                         | 5.760                       | 6.372           | 6.425                         | 6.323                       | Yes                            | Yes                            |
| 14                  | B_0526 | 1.888 | 0.780 | 6.051           | 6.065                         | 6.037                       | 5.132           | 5.261                         | 4.993                       | Yes                            | Yes                            |
| 15                  | B_0956 | 1.885 | 0.671 | 6.591           | 6.602                         | 6.572                       | 6.367           | 6.443                         | 6.291                       | Yes                            | Yes                            |
| 16                  | B_0224 | 1.883 | 0.398 | 1.081           | 1.107                         | 1.054                       | 2.532           | 2.617                         | 2.448                       | No                             | Yes                            |
| 17                  | B_0454 | 1.872 | 0.795 | 5.521           | 5.547                         | 5.496                       | 5.536           | 5.671                         | 5.396                       | Yes                            | Yes                            |
| 18                  | B_0148 | 1.872 | 0.917 | 3.383           | 3.445                         | 3.323                       | 5.358           | 5.490                         | 5.218                       | Yes                            | Yes                            |
| 19                  | B_0459 | 1.863 | 0.847 | 5.259           | 5.313                         | 5.206                       | 5.304           | 5.415                         | 5.189                       | Yes                            | Yes                            |
| 20                  | B_0214 | 1.856 | 0.867 | 1.556           | 1.589                         | 1.529                       | 4.269           | 4.377                         | 4.152                       | Yes                            | Yes                            |
| 21                  | B_0127 | 1.855 | 0.662 | 2.284           | 2.313                         | 2.259                       | 2.090           | 2.163                         | 2.022                       | No                             | No                             |
| 22                  | B_0980 | 1.854 | 0.868 | 6.967           | 6.992                         | 6.938                       | 6.992           | 7.104                         | 6.880                       | Yes                            | Yes                            |
| 23                  | B_0473 | 1.854 | 0.943 | 5.140           | 5.197                         | 5.079                       | 6.108           | 6.228                         | 5.986                       | Yes                            | Yes                            |
| 24                  | B_0477 | 1.853 | 0.816 | 5.086           | 5.099                         | 5.073                       | 5.822           | 5.871                         | 5.773                       | Yes                            | No                             |
| 25                  | B_0633 | 1.853 | 0.384 | 2.284           | 2.320                         | 2.252                       | 5.968           | 6.024                         | 5.912                       | No                             | Yes                            |
| 26                  | B_0223 | 1.851 | 0.352 | 1.150           | 1.166                         | 1.127                       | 2.575           | 2.667                         | 2.485                       | No                             | Yes                            |
| 27                  | B_0147 | 1.847 | 0.934 | 3.249           | 3.319                         | 3.184                       | 5.283           | 5.424                         | 5.140                       | Yes                            | Yes                            |
| 28                  | B_0962 | 1.847 | 0.919 | 6.556           | 6.601                         | 6.503                       | 5.768           | 5.894                         | 5.643                       | Yes                            | Yes                            |
| 29                  | B_0463 | 1.846 | 0.728 | 5.091           | 5.118                         | 5.065                       | 5.369           | 5.452                         | 5.284                       | Yes                            | Yes                            |
| 30                  | B_0502 | 1.844 | 0.965 | 5.987           | 6.017                         | 5.956                       | 5.558           | 5.658                         | 5.465                       | Yes                            | Yes                            |
| 31                  | B_1006 | 1.842 | 0.599 | 7.284           | 7.302                         | 7.267                       | 7.176           | 7.211                         | 7.149                       | Yes                            | Yes                            |
| 32                  | B_0991 | 1.839 | 0.725 | 7.180           | 7.201                         | 7.156                       | 6.976           | 7.046                         | 6.901                       | Yes                            | Yes                            |
| 33                  | B_0033 | 1.836 | 0.892 | 2.289           | 2.317                         | 2.258                       | 1.496           | 1.572                         | 1.429                       | No                             | Yes                            |
| 34                  | B_0263 | 1.833 | 0.967 | 4.249           | 4.294                         | 4.200                       | 1.540           | 1.636                         | 1.446                       | Yes                            | Yes                            |
| 35                  | B_0593 | 1.833 | 0.983 | 4.244           | 4.288                         | 4.198                       | 4.258           | 4.344                         | 4.175                       | Yes                            | Yes                            |
| 36                  | B_0226 | 1.825 | 0.387 | 1.046           | 1.082                         | 1.008                       | 2.235           | 2.324                         | 2.154                       | No                             | No                             |
| 37                  | B_0017 | 1.825 | 0.935 | 1.338           | 1.370                         | 1.307                       | 0.898           | 1.009                         | 0.789                       | Yes                            | No                             |
| 38                  | B_0023 | 1.812 | 1.001 | 1.437           | 1.478                         | 1.398                       | 0.909           | 0.989                         | 0.838                       | Yes                            | No                             |
| 39                  | B_0082 | 1.810 | 0.958 | 2.314           | 2.360                         | 2.266                       | 2.947           | 3.035                         | 2.865                       | No                             | Yes                            |
| 40                  | B_0476 | 1.802 | 0.676 | 5.130           | 5.145                         | 5.109                       | 5.800           | 5.841                         | 5.763                       | Yes                            | No                             |
| 41                  | B_1023 | 1.801 | 0.747 | 8.244           | 8.261                         | 8.225                       | 8.233           | 8.292                         | 8.172                       | No                             | No                             |
| 42                  | B_0549 | 1.800 | 0.945 | 6.284           | 6.306                         | 6.255                       | 5.854           | 5.972                         | 5.743                       | No                             | Yes                            |

Table SI 9- 100 first UF COSY VIP buckets from OPLS-DA (Part 2/3)

| UF COSY VIP Ranking | Nom    | V1    | V2    | Center F1 [ppm] | Start <sup>1</sup> H F1 [ppm] | End <sup>1</sup> H F1 [ppm] | Center F2 [ppm] | Start <sup>1</sup> H F2 [ppm] | End <sup>1</sup> H F2 [ppm] | Potential correspondence in F1 | Potential correspondence in F2 |
|---------------------|--------|-------|-------|-----------------|-------------------------------|-----------------------------|-----------------|-------------------------------|-----------------------------|--------------------------------|--------------------------------|
| 43                  | B_0081 | 1.799 | 0.979 | 2.962           | 3.002                         | 2.925                       | 2.305           | 2.400                         | 2.210                       | Yes                            | No                             |
| 44                  | B_0528 | 1.796 | 0.760 | 5.987           | 5.992                         | 5.979                       | 5.110           | 5.225                         | 4.996                       | No                             | Yes                            |
| 45                  | B_0458 | 1.792 | 1.022 | 5.378           | 5.435                         | 5.316                       | 5.385           | 5.497                         | 5.281                       | Yes                            | Yes                            |
| 46                  | B_0442 | 1.790 | 0.782 | 5.650           | 5.673                         | 5.630                       | 5.094           | 5.147                         | 5.042                       | No                             | Yes                            |
| 47                  | B_0026 | 1.786 | 0.990 | 1.734           | 1.758                         | 1.713                       | 1.723           | 1.861                         | 1.588                       | Yes                            | Yes                            |
| 48                  | B_0781 | 1.785 | 0.975 | 5.784           | 5.808                         | 5.762                       | 2.300           | 2.396                         | 2.199                       | Yes                            | No                             |
| 49                  | B_0103 | 1.784 | 0.854 | 2.962           | 3.001                         | 2.927                       | 2.473           | 2.539                         | 2.406                       | Yes                            | Yes                            |
| 50                  | B_0748 | 1.784 | 0.486 | 7.289           | 7.311                         | 7.271                       | 1.049           | 1.122                         | 0.974                       | Yes                            | No                             |
| 51                  | B_0965 | 1.779 | 0.479 | 6.596           | 6.619                         | 6.573                       | 6.620           | 6.731                         | 6.504                       | Yes                            | Yes                            |
| 52                  | B_0783 | 1.777 | 0.572 | 5.804           | 5.826                         | 5.788                       | 2.090           | 2.180                         | 1.997                       | No                             | No                             |
| 53                  | B_0585 | 1.776 | 0.823 | 4.536           | 4.641                         | 4.429                       | 4.549           | 4.679                         | 4.413                       | No                             | No                             |
| 54                  | B_0957 | 1.770 | 1.047 | 6.680           | 6.721                         | 6.637                       | 6.340           | 6.482                         | 6.197                       | No                             | Yes                            |
| 55                  | B_0028 | 1.768 | 0.994 | 1.452           | 1.507                         | 1.395                       | 2.095           | 2.182                         | 2.012                       | Yes                            | No                             |
| 56                  | B_0699 | 1.768 | 0.722 | 6.957           | 6.985                         | 6.937                       | 0.725           | 0.804                         | 0.652                       | Yes                            | Yes                            |
| 57                  | B_0241 | 1.768 | 1.016 | 3.259           | 3.309                         | 3.208                       | 1.718           | 1.839                         | 1.599                       | Yes                            | Yes                            |
| 58                  | B_0175 | 1.765 | 0.671 | 3.279           | 3.296                         | 3.255                       | 3.783           | 3.862                         | 3.701                       | Yes                            | Yes                            |
| 59                  | B_0630 | 1.764 | 0.747 | 1.700           | 1.748                         | 1.654                       | 5.299           | 5.416                         | 5.181                       | Yes                            | Yes                            |
| 60                  | B_0771 | 1.764 | 1.018 | 5.269           | 5.310                         | 5.224                       | 1.718           | 1.833                         | 1.595                       | Yes                            | Yes                            |
| 61                  | B_0472 | 1.757 | 0.709 | 5.794           | 5.815                         | 5.770                       | 5.962           | 6.022                         | 5.900                       | No                             | Yes                            |
| 62                  | B_0894 | 1.753 | 0.588 | 5.650           | 5.678                         | 5.627                       | 8.346           | 8.415                         | 8.277                       | No                             | No                             |
| 63                  | B_0539 | 1.750 | 0.726 | 6.036           | 6.050                         | 6.020                       | 5.833           | 5.900                         | 5.763                       | Yes                            | No                             |
| 64                  | B_0516 | 1.748 | 0.738 | 6.041           | 6.052                         | 6.028                       | 5.385           | 5.468                         | 5.298                       | Yes                            | Yes                            |
| 65                  | B_0029 | 1.746 | 1.000 | 1.482           | 1.529                         | 1.442                       | 2.305           | 2.392                         | 2.209                       | Yes                            | No                             |
| 66                  | B_0138 | 1.745 | 0.641 | 2.531           | 2.564                         | 2.498                       | 1.076           | 1.141                         | 1.009                       | No                             | No                             |
| 67                  | B_1005 | 1.744 | 0.731 | 7.294           | 7.332                         | 7.264                       | 7.332           | 7.441                         | 7.218                       | Yes                            | Yes                            |
| 68                  | B_0200 | 1.735 | 0.956 | 3.279           | 3.303                         | 3.256                       | 3.271           | 3.392                         | 3.149                       | Yes                            | Yes                            |
| 69                  | B_0128 | 1.734 | 0.841 | 2.121           | 2.148                         | 2.093                       | 1.928           | 1.986                         | 1.872                       | No                             | No                             |
| 70                  | B_0481 | 1.733 | 0.495 | 5.051           | 5.072                         | 5.033                       | 6.038           | 6.133                         | 5.946                       | Yes                            | Yes                            |
| 71                  | B_0151 | 1.730 | 0.918 | 3.596           | 3.612                         | 3.574                       | 5.407           | 5.474                         | 5.346                       | No                             | Yes                            |
| 72                  | B_0525 | 1.728 | 1.137 | 6.091           | 6.112                         | 6.068                       | 5.148           | 5.261                         | 5.029                       | Yes                            | Yes                            |
| 73                  | B_0538 | 1.727 | 0.447 | 6.036           | 6.046                         | 6.017                       | 6.021           | 6.126                         | 5.917                       | Yes                            | Yes                            |
| 74                  | B_0953 | 1.727 | 0.924 | 6.333           | 6.352                         | 6.318                       | 6.162           | 6.229                         | 6.097                       | No                             | No                             |
| 75                  | B_0201 | 1.725 | 0.526 | 3.323           | 3.342                         | 3.306                       | 3.325           | 3.463                         | 3.182                       | No                             | Yes                            |
| 76                  | B_0555 | 1.721 | 0.757 | 6.393           | 6.411                         | 6.378                       | 6.307           | 6.343                         | 6.267                       | No                             | No                             |
| 77                  | B_0598 | 1.720 | 1.062 | 4.620           | 4.641                         | 4.598                       | 5.461           | 5.540                         | 5.383                       | No                             | Yes                            |
| 78                  | B_0004 | 1.720 | 1.150 | 1.502           | 1.560                         | 1.447                       | 1.523           | 1.658                         | 1.389                       | Yes                            | Yes                            |
| 79                  | B_0084 | 1.719 | 0.712 | 2.477           | 2.501                         | 2.454                       | 2.467           | 2.559                         | 2.378                       | Yes                            | Yes                            |
| 80                  | B_0518 | 1.716 | 1.005 | 6.140           | 6.156                         | 6.117                       | 5.412           | 5.510                         | 5.311                       | No                             | Yes                            |
| 81                  | B_0443 | 1.709 | 0.767 | 5.650           | 5.677                         | 5.630                       | 4.975           | 5.035                         | 4.908                       | No                             | No                             |
| 82                  | B_0487 | 1.703 | 1.099 | 5.843           | 5.884                         | 5.802                       | 6.307           | 6.408                         | 6.208                       | No                             | Yes                            |
| 83                  | B_0898 | 1.701 | 0.794 | 5.873           | 5.918                         | 5.823                       | 8.556           | 8.624                         | 8.490                       | No                             | No                             |
| 84                  | B_0434 | 1.697 | 1.071 | 5.432           | 5.458                         | 5.409                       | 4.630           | 4.727                         | 4.534                       | Yes                            | No                             |

**Table SI 10 - 100 first UF COSY VIP buckets from OPLS-DA (Part 3/3)**

| UF<br>COSY<br>VIP<br>Ranking | Nom    | V1    | V2    | Center<br>F1<br>[ppm] | Start<br><sup>1</sup> H<br>F1<br>[ppm] | End <sup>1</sup> H<br>F1<br>[ppm] | Center<br>F2<br>[ppm] | Start<br><sup>1</sup> H<br>F2<br>[ppm] | End <sup>1</sup> H<br>F2<br>[ppm] | Potential<br>correspondence<br>in F1 | Potential<br>correspondence<br>in F2 |
|------------------------------|--------|-------|-------|-----------------------|----------------------------------------|-----------------------------------|-----------------------|----------------------------------------|-----------------------------------|--------------------------------------|--------------------------------------|
| 85                           | B_0268 | 1.691 | 0.632 | 4.422                 | 4.444                                  | 4.400                             | 2.063                 | 2.127                                  | 1.995                             | Yes                                  | No                                   |
| 86                           | B_0203 | 1.691 | 0.641 | 3.427                 | 3.443                                  | 3.404                             | 3.406                 | 3.507                                  | 3.306                             | Yes                                  | Yes                                  |
| 87                           | B_0503 | 1.688 | 0.849 | 6.036                 | 6.050                                  | 6.019                             | 5.558                 | 5.622                                  | 5.488                             | Yes                                  | Yes                                  |
| 88                           | B_0635 | 1.687 | 0.901 | 2.304                 | 2.328                                  | 2.280                             | 5.601                 | 5.689                                  | 5.512                             | No                                   | Yes                                  |
| 89                           | B_0982 | 1.687 | 0.422 | 7.036                 | 7.049                                  | 7.026                             | 7.165                 | 7.197                                  | 7.129                             | No                                   | Yes                                  |
| 90                           | B_0895 | 1.685 | 0.816 | 5.705                 | 5.722                                  | 5.681                             | 8.394                 | 8.444                                  | 8.338                             | No                                   | No                                   |
| 91                           | B_1002 | 1.682 | 1.136 | 7.234                 | 7.262                                  | 7.212                             | 7.257                 | 7.357                                  | 7.156                             | Yes                                  | Yes                                  |
| 92                           | B_0500 | 1.682 | 0.974 | 5.888                 | 5.916                                  | 5.859                             | 5.887                 | 5.943                                  | 5.828                             | No                                   | No                                   |
| 93                           | B_0043 | 1.681 | 0.809 | 1.507                 | 1.537                                  | 1.475                             | 1.324                 | 1.368                                  | 1.279                             | Yes                                  | Yes                                  |
| 94                           | B_0269 | 1.680 | 0.982 | 4.229                 | 4.261                                  | 4.200                             | 1.189                 | 1.240                                  | 1.136                             | Yes                                  | No                                   |
| 95                           | B_0035 | 1.679 | 1.163 | 2.116                 | 2.147                                  | 2.081                             | 1.448                 | 1.518                                  | 1.372                             | No                                   | Yes                                  |
| 96                           | B_0784 | 1.678 | 1.038 | 5.853                 | 5.874                                  | 5.829                             | 2.117                 | 2.238                                  | 2.002                             | No                                   | No                                   |
| 97                           | B_0018 | 1.677 | 1.004 | 1.338                 | 1.356                                  | 1.316                             | 1.486                 | 1.533                                  | 1.437                             | Yes                                  | Yes                                  |
| 98                           | B_1019 | 1.676 | 0.472 | 7.482                 | 7.498                                  | 7.466                             | 7.364                 | 7.386                                  | 7.348                             | No                                   | No                                   |
| 99                           | B_0149 | 1.676 | 1.231 | 3.536                 | 3.568                                  | 3.504                             | 5.401                 | 5.546                                  | 5.257                             | No                                   | Yes                                  |
| 100                          | B_0546 | 1.671 | 0.939 | 6.091                 | 6.114                                  | 6.074                             | 5.881                 | 5.923                                  | 5.835                             | Yes                                  | No                                   |



**Table SI 11 - 100 first SYMAPS HSQC VIP buckets from OPLS-DA (Part 1/3)**

| HSQC VIP Ranking | Bucket | V1    | V2    | Center F1 [ppm] | Start <sup>13</sup> C F1 [ppm] | End <sup>13</sup> C F1 [ppm] | Center F2 [ppm] | Start <sup>1</sup> H F2 [ppm] | End <sup>1</sup> H F2 [ppm] | Potential correspondence in <sup>13</sup> C folded | Potential correspondence in <sup>1</sup> H |
|------------------|--------|-------|-------|-----------------|--------------------------------|------------------------------|-----------------|-------------------------------|-----------------------------|----------------------------------------------------|--------------------------------------------|
| 1                | B338   | 1.527 | 0.355 | 19.360          | 19.762                         | 18.978                       | 6.605           | 6.607                         | 6.601                       | Yes                                                | Yes                                        |
| 2                | B352   | 1.491 | 0.424 | 25.928          | 26.622                         | 25.282                       | 7.301           | 7.307                         | 7.294                       | Yes                                                | Yes                                        |
| 3                | B411   | 1.488 | 0.429 | 21.708          | 22.239                         | 21.215                       | 7.276           | 7.285                         | 7.267                       | Yes                                                | Yes                                        |
| 4                | B355   | 1.485 | 0.414 | 18.504          | 18.978                         | 17.998                       | 7.161           | 7.168                         | 7.154                       | Yes                                                | Yes                                        |
| 5                | B290   | 1.481 | 0.439 | 38.111          | 38.737                         | 37.520                       | 5.073           | 5.092                         | 5.055                       | Yes                                                | Yes                                        |
| 6                | B291   | 1.478 | 0.432 | 38.111          | 38.694                         | 37.477                       | 5.531           | 5.551                         | 5.511                       | Yes                                                | Yes                                        |
| 7                | B353   | 1.475 | 0.398 | 25.864          | 26.524                         | 25.217                       | 7.287           | 7.293                         | 7.282                       | Yes                                                | Yes                                        |
| 8                | B413   | 1.469 | 0.361 | 21.772          | 22.300                         | 21.281                       | 7.185           | 7.190                         | 7.179                       | Yes                                                | Yes                                        |
| 9                | B35    | 1.458 | 0.434 | 19.202          | 19.885                         | 18.517                       | 2.472           | 2.495                         | 2.448                       | Yes                                                | Yes                                        |
| 10               | B327   | 1.458 | 0.598 | 8.541           | 9.440                          | 7.611                        | 6.326           | 6.339                         | 6.313                       | Yes                                                | No                                         |
| 11               | B20    | 1.454 | 0.622 | 33.130          | 34.352                         | 31.932                       | 2.304           | 2.362                         | 2.246                       | Yes                                                | No                                         |
| 12               | B3     | 1.454 | 0.571 | 16.759          | 17.844                         | 15.684                       | 1.679           | 1.731                         | 1.628                       | Yes                                                | Yes                                        |
| 13               | B326   | 1.454 | 0.568 | 9.715           | 10.387                         | 9.015                        | 6.263           | 6.276                         | 6.250                       | Yes                                                | No                                         |
| 14               | B350   | 1.453 | 0.443 | 29.259          | 29.921                         | 28.647                       | 7.245           | 7.253                         | 7.237                       | Yes                                                | No                                         |
| 15               | B65    | 1.453 | 0.528 | 16.790          | 17.709                         | 15.846                       | 1.598           | 1.619                         | 1.576                       | Yes                                                | Yes                                        |
| 16               | B313   | 1.447 | 0.520 | 8.858           | 9.375                          | 8.297                        | 6.001           | 6.008                         | 5.994                       | Yes                                                | Yes                                        |
| 17               | B314   | 1.446 | 0.601 | 8.890           | 9.407                          | 8.362                        | 5.979           | 5.988                         | 5.970                       | Yes                                                | No                                         |
| 18               | B357   | 1.444 | 0.603 | 28.561          | 29.137                         | 27.961                       | 7.440           | 7.456                         | 7.424                       | Yes                                                | Yes                                        |
| 19               | B296   | 1.440 | 0.551 | 28.022          | 28.774                         | 27.319                       | 5.129           | 5.135                         | 5.123                       | Yes                                                | Yes                                        |
| 20               | B200   | 1.438 | 0.302 | 36.525          | 37.157                         | 35.923                       | 1.353           | 1.360                         | 1.346                       | Yes                                                | Yes                                        |
| 21               | B312   | 1.437 | 0.557 | 13.840          | 14.503                         | 13.196                       | 6.019           | 6.031                         | 6.008                       | Yes                                                | Yes                                        |
| 22               | B21    | 1.430 | 0.633 | 34.050          | 34.668                         | 33.458                       | 2.120           | 2.136                         | 2.105                       | Yes                                                | No                                         |
| 23               | B6     | 1.426 | 0.603 | 19.075          | 19.745                         | 18.415                       | 1.752           | 1.823                         | 1.681                       | Yes                                                | Yes                                        |
| 24               | B117   | 1.425 | 0.594 | 34.685          | 35.088                         | 34.243                       | 1.475           | 1.484                         | 1.465                       | No                                                 | No                                         |
| 25               | B421   | 1.424 | 0.201 | 53.118          | 53.881                         | 52.340                       | 0.831           | 0.836                         | 0.826                       | No                                                 | No                                         |
| 26               | B331   | 1.421 | 0.636 | 19.424          | 20.121                         | 18.717                       | 6.685           | 6.696                         | 6.674                       | Yes                                                | Yes                                        |
| 27               | B337   | 1.421 | 0.631 | 19.424          | 19.860                         | 18.978                       | 6.590           | 6.595                         | 6.583                       | Yes                                                | Yes                                        |
| 28               | B138   | 1.417 | 0.565 | 50.929          | 51.543                         | 50.297                       | 1.690           | 1.698                         | 1.683                       | Yes                                                | Yes                                        |
| 29               | B142   | 1.417 | 0.651 | 57.750          | 58.960                         | 56.529                       | 1.752           | 1.770                         | 1.733                       | Yes                                                | Yes                                        |
| 30               | B339   | 1.413 | 0.588 | 31.893          | 32.501                         | 31.260                       | 6.606           | 6.616                         | 6.596                       | Yes                                                | Yes                                        |
| 31               | B38    | 1.412 | 0.705 | 24.659          | 25.567                         | 23.725                       | 2.070           | 2.106                         | 2.033                       | Yes                                                | No                                         |
| 32               | B51    | 1.407 | 0.688 | 16.886          | 17.628                         | 16.143                       | 1.947           | 1.971                         | 1.922                       | Yes                                                | No                                         |
| 33               | B214   | 1.400 | 0.471 | 66.190          | 66.720                         | 65.680                       | 1.536           | 1.538                         | 1.533                       | No                                                 | Yes                                        |
| 34               | B311   | 1.397 | 0.689 | 13.776          | 14.307                         | 13.262                       | 6.043           | 6.053                         | 6.032                       | Yes                                                | Yes                                        |
| 35               | B134   | 1.394 | 0.653 | 49.882          | 51.045                         | 48.739                       | 1.754           | 1.772                         | 1.735                       | Yes                                                | Yes                                        |
| 36               | B58    | 1.390 | 0.661 | 21.740          | 22.757                         | 20.678                       | 1.445           | 1.460                         | 1.431                       | Yes                                                | Yes                                        |
| 37               | B15    | 1.386 | 0.721 | 30.560          | 31.353                         | 29.775                       | 1.378           | 1.433                         | 1.323                       | Yes                                                | Yes                                        |
| 38               | B304   | 1.384 | 0.711 | 13.808          | 14.283                         | 13.363                       | 6.066           | 6.078                         | 6.055                       | Yes                                                | Yes                                        |
| 39               | B317   | 1.383 | 0.714 | 11.111          | 11.563                         | 10.649                       | 5.805           | 5.811                         | 5.799                       | Yes                                                | No                                         |
| 40               | B23    | 1.382 | 0.732 | 22.977          | 23.778                         | 22.147                       | 2.987           | 3.021                         | 2.952                       | No                                                 | Yes                                        |
| 41               | B423   | 1.382 | 0.609 | 59.146          | 59.904                         | 58.409                       | 0.913           | 0.918                         | 0.908                       | Yes                                                | No                                         |
| 42               | B201   | 1.379 | 0.683 | 47.947          | 48.335                         | 47.564                       | 1.341           | 1.346                         | 1.335                       | No                                                 | Yes                                        |

Table SI 12 - 100 first SYMAPS HSQC buckets from OPLS-DA (Part 2/3)

| HSQC VIP Ranking | Bucket | V1    | V2    | Center F1 [ppm] | Start <sup>13</sup> C F1 [ppm] | End <sup>13</sup> C F1 [ppm] | Center F2 [ppm] | Start <sup>1</sup> H F2 [ppm] | End <sup>1</sup> H F2 [ppm] | Potential correspondence in <sup>13</sup> C folded | Potential correspondence in <sup>1</sup> H |
|------------------|--------|-------|-------|-----------------|--------------------------------|------------------------------|-----------------|-------------------------------|-----------------------------|----------------------------------------------------|--------------------------------------------|
| 43               | B14    | 1.373 | 0.747 | 28.720          | 29.512                         | 27.934                       | 1.353           | 1.406                         | 1.299                       | Yes                                                | Yes                                        |
| 44               | B365   | 1.372 | 0.757 | 66.317          | 67.517                         | 65.100                       | 10.053          | 10.115                        | 9.989                       | No                                                 | Yes                                        |
| 45               | B318   | 1.370 | 0.707 | 11.175          | 11.563                         | 10.812                       | 5.793           | 5.798                         | 5.788                       | Yes                                                | No                                         |
| 46               | B433   | 1.369 | 0.612 | 20.661          | 21.431                         | 19.890                       | 0.947           | 0.955                         | 0.938                       | Yes                                                | No                                         |
| 47               | B300   | 1.366 | 0.757 | 18.789          | 20.400                         | 17.193                       | 5.280           | 5.299                         | 5.261                       | Yes                                                | Yes                                        |
| 48               | B224   | 1.364 | 0.742 | 37.572          | 38.082                         | 37.041                       | 1.275           | 1.286                         | 1.265                       | Yes                                                | Yes                                        |
| 49               | B310   | 1.364 | 0.755 | 13.808          | 14.438                         | 13.196                       | 6.089           | 6.097                         | 6.081                       | Yes                                                | Yes                                        |
| 50               | B330   | 1.361 | 0.764 | 19.392          | 20.056                         | 18.717                       | 6.567           | 6.582                         | 6.551                       | Yes                                                | No                                         |
| 51               | B334   | 1.361 | 0.723 | 19.551          | 19.991                         | 19.076                       | 6.526           | 6.532                         | 6.519                       | Yes                                                | No                                         |
| 52               | B42    | 1.360 | 0.723 | 24.722          | 25.514                         | 23.936                       | 2.221           | 2.252                         | 2.189                       | Yes                                                | No                                         |
| 53               | B315   | 1.360 | 0.726 | 6.542           | 7.349                          | 5.749                        | 5.833           | 5.846                         | 5.821                       | Yes                                                | No                                         |
| 54               | B111   | 1.359 | 0.729 | 38.587          | 39.097                         | 38.105                       | 1.508           | 1.513                         | 1.503                       | Yes                                                | No                                         |
| 55               | B380   | 1.357 | 0.694 | 25.293          | 26.046                         | 24.544                       | 2.973           | 2.983                         | 2.962                       | Yes                                                | Yes                                        |
| 56               | B238   | 1.355 | 0.643 | 39.793          | 40.510                         | 39.084                       | 1.368           | 1.377                         | 1.359                       | No                                                 | No                                         |
| 57               | B120   | 1.354 | 0.716 | 22.121          | 22.768                         | 21.445                       | 1.534           | 1.560                         | 1.508                       | Yes                                                | Yes                                        |
| 58               | B275   | 1.354 | 0.320 | 30.592          | 31.311                         | 29.923                       | 1.733           | 1.737                         | 1.729                       | Yes                                                | Yes                                        |
| 59               | B141   | 1.351 | 0.751 | 58.258          | 59.895                         | 56.592                       | 1.688           | 1.712                         | 1.665                       | Yes                                                | Yes                                        |
| 60               | B54    | 1.348 | 0.784 | 16.981          | 17.979                         | 16.008                       | 1.760           | 1.787                         | 1.733                       | Yes                                                | Yes                                        |
| 61               | B299   | 1.348 | 0.761 | 28.212          | 28.507                         | 27.913                       | 5.078           | 5.088                         | 5.069                       | Yes                                                | Yes                                        |
| 62               | B356   | 1.345 | 0.772 | 19.836          | 20.285                         | 19.337                       | 7.108           | 7.113                         | 7.103                       | Yes                                                | Yes                                        |
| 63               | B303   | 1.344 | 0.784 | 11.016          | 11.640                         | 10.393                       | 5.768           | 5.779                         | 5.758                       | Yes                                                | No                                         |
| 64               | B60    | 1.339 | 0.780 | 24.722          | 25.349                         | 24.107                       | 1.321           | 1.333                         | 1.309                       | Yes                                                | Yes                                        |
| 65               | B414   | 1.338 | 0.631 | 43.378          | 43.982                         | 42.768                       | 0.902           | 0.907                         | 0.896                       | No                                                 | No                                         |
| 66               | B267   | 1.336 | 0.770 | 53.784          | 54.360                         | 53.199                       | 1.705           | 1.713                         | 1.696                       | No                                                 | Yes                                        |
| 67               | B298   | 1.326 | 0.817 | 28.180          | 28.804                         | 27.557                       | 5.101           | 5.111                         | 5.090                       | Yes                                                | Yes                                        |
| 68               | B39    | 1.325 | 0.691 | 26.975          | 27.724                         | 26.198                       | 2.086           | 2.120                         | 2.052                       | Yes                                                | No                                         |
| 69               | B46    | 1.325 | 0.764 | 16.790          | 17.466                         | 16.143                       | 2.031           | 2.055                         | 2.008                       | Yes                                                | No                                         |
| 70               | B13    | 1.323 | 0.849 | 24.595          | 25.429                         | 23.746                       | 1.735           | 1.875                         | 1.594                       | Yes                                                | Yes                                        |
| 71               | B370   | 1.323 | 0.667 | 48.105          | 49.010                         | 47.231                       | 3.271           | 3.281                         | 3.261                       | No                                                 | Yes                                        |
| 72               | B336   | 1.321 | 0.627 | 19.614          | 20.056                         | 19.141                       | 6.544           | 6.549                         | 6.538                       | Yes                                                | No                                         |
| 73               | B405   | 1.318 | 0.745 | 26.911          | 27.430                         | 26.402                       | 3.569           | 3.577                         | 3.561                       | Yes                                                | No                                         |
| 74               | B297   | 1.316 | 0.800 | 28.117          | 28.745                         | 27.468                       | 5.117           | 5.122                         | 5.112                       | Yes                                                | Yes                                        |
| 75               | B109   | 1.315 | 0.765 | 38.555          | 39.001                         | 38.067                       | 1.495           | 1.502                         | 1.488                       | Yes                                                | No                                         |
| 76               | B320   | 1.313 | 0.684 | 11.016          | 11.465                         | 10.551                       | 5.729           | 5.734                         | 5.724                       | Yes                                                | No                                         |
| 77               | B129   | 1.312 | 0.617 | 61.145          | 61.889                         | 60.393                       | 1.478           | 1.484                         | 1.471                       | No                                                 | No                                         |
| 78               | B319   | 1.311 | 0.608 | 11.111          | 11.498                         | 10.747                       | 5.745           | 5.749                         | 5.741                       | Yes                                                | Yes                                        |
| 79               | B412   | 1.311 | 0.822 | 21.835          | 22.370                         | 21.298                       | 7.231           | 7.237                         | 7.225                       | Yes                                                | No                                         |
| 80               | B345   | 1.310 | 0.781 | 26.277          | 26.883                         | 25.642                       | 6.842           | 6.859                         | 6.825                       | Yes                                                | Yes                                        |
| 81               | B393   | 1.308 | 0.804 | 26.753          | 27.272                         | 26.244                       | 3.753           | 3.765                         | 3.741                       | Yes                                                | No                                         |
| 82               | B43    | 1.305 | 0.625 | 16.790          | 17.360                         | 16.255                       | 2.177           | 2.197                         | 2.157                       | Yes                                                | No                                         |
| 83               | B78    | 1.305 | 0.833 | 10.318          | 11.358                         | 9.281                        | 1.697           | 1.750                         | 1.644                       | Yes                                                | Yes                                        |
| 84               | B37    | 1.300 | 0.874 | 24.722          | 25.672                         | 23.778                       | 1.996           | 2.031                         | 1.961                       | Yes                                                | No                                         |

**Table SI 13 - 100 first SYMAPS HSQC VIP buckets from OPLS-DA (Part 3/3)**

| HSQC VIP Ranking | Bucket | V1    | V2    | Center F1 [ppm] | Start <sup>13</sup> C F1 [ppm] | End <sup>13</sup> C F1 [ppm] | Center F2 [ppm] | Start <sup>1</sup> H F2 [ppm] | End <sup>1</sup> H F2 [ppm] | Potential correspondence in <sup>13</sup> C folded | Potential correspondence in <sup>1</sup> H |
|------------------|--------|-------|-------|-----------------|--------------------------------|------------------------------|-----------------|-------------------------------|-----------------------------|----------------------------------------------------|--------------------------------------------|
| OP85             | B188   | 1.300 | 0.819 | 62.224          | 62.789                         | 61.710                       | 1.245           | 1.255                         | 1.235                       | No                                                 | No                                         |
| 86               | B63    | 1.300 | 0.824 | 22.152          | 23.000                         | 21.299                       | 1.342           | 1.358                         | 1.326                       | Yes                                                | Yes                                        |
| 87               | B410   | 1.297 | 0.876 | 18.916          | 19.446                         | 18.379                       | 5.237           | 5.259                         | 5.214                       | Yes                                                | No                                         |
| 88               | B61    | 1.293 | 0.880 | 24.786          | 25.457                         | 24.134                       | 1.258           | 1.290                         | 1.225                       | Yes                                                | Yes                                        |
| 89               | B123   | 1.289 | 0.880 | 47.661          | 48.552                         | 46.744                       | 1.500           | 1.512                         | 1.489                       | No                                                 | No                                         |
| 90               | B280   | 1.288 | 0.827 | 29.608          | 30.052                         | 29.213                       | 1.641           | 1.658                         | 1.624                       | Yes                                                | Yes                                        |
| 91               | B435   | 1.279 | 0.849 | 26.689          | 27.220                         | 26.147                       | 0.957           | 0.968                         | 0.945                       | Yes                                                | No                                         |
| 92               | B102   | 1.278 | 0.607 | 35.287          | 35.720                         | 34.861                       | 1.741           | 1.750                         | 1.731                       | No                                                 | Yes                                        |
| 93               | B259   | 1.278 | 0.624 | 66.571          | 66.974                         | 66.172                       | 1.728           | 1.732                         | 1.724                       | No                                                 | Yes                                        |
| 94               | B199   | 1.277 | 0.837 | 45.884          | 46.485                         | 45.290                       | 1.250           | 1.261                         | 1.239                       | No                                                 | No                                         |
| 95               | B53    | 1.277 | 0.893 | 16.759          | 17.736                         | 15.819                       | 1.894           | 1.917                         | 1.870                       | Yes                                                | No                                         |
| 96               | B32    | 1.276 | 0.819 | 26.626          | 27.303                         | 25.935                       | 3.457           | 3.485                         | 3.430                       | Yes                                                | No                                         |
| 97               | B281   | 1.275 | 0.900 | 28.434          | 28.890                         | 27.986                       | 1.638           | 1.660                         | 1.616                       | Yes                                                | Yes                                        |
| 98               | B409   | 1.273 | 0.853 | 18.853          | 19.327                         | 18.379                       | 5.312           | 5.326                         | 5.299                       | Yes                                                | No                                         |
| 99               | B418   | 1.272 | 0.847 | 43.346          | 43.842                         | 42.815                       | 0.926           | 0.929                         | 0.922                       | No                                                 | No                                         |
| 100              | B258   | 1.271 | 0.764 | 66.634          | 67.227                         | 66.088                       | 1.735           | 1.737                         | 1.732                       | No                                                 | Yes                                        |

**Table SI 14 - Global data for all <sup>1</sup>H NMR buckets:** Minimum (MIN), maximum (MAX) and mean SNR were measured for each sample group. To quantify the proportion of data under the limit of detection and quantification, number of buckets with a Signal to Noise Ratio (SNR) under 3 and 10 have been counted.

|                                 | Blank_Ctrl | Blank_Sponge | Control_T1 | Control_T2 | QC    | Sponge_T1 | Sponge_T2 |
|---------------------------------|------------|--------------|------------|------------|-------|-----------|-----------|
| <b>MIN</b>                      | 0          | 0            | 0          | 0          | 0     | 0         | 1         |
| <b>MAX</b>                      | 11471      | 17332        | 20872      | 17698      | 24118 | 21244     | 21870     |
| <b>MEAN</b>                     | 117        | 195          | 768        | 706        | 775   | 769       | 802       |
| Number of buckets with a SNR<3  | 256        | 167          | 10         | 16         | 12    | 15        | 12        |
| <b>% SNR&lt;3</b>               | 28%        | 19%          | 1%         | 2%         | 1%    | 2%        | 1%        |
| Number of buckets with a SNR<10 | 400        | 340          | 63         | 65         | 63    | 78        | 65        |
| <b>% SNR&lt;10</b>              | 44%        | 38%          | 7%         | 7%         | 7%    | 9%        | 7%        |
| Total buckets                   | 901        | 901          | 901        | 900        | 900   | 901       | 901       |

**Table SI 15 - Global data for all <sup>13</sup>C NMR buckets:** Minimum (MIN), maximum (MAX) and mean SNR were measured for each sample group. To quantify the proportion of data under the limit of detection and quantification, number of buckets with a Signal to Noise Ratio (SNR) under 3 and 10 have been counted.

|                                 | Blank_Ctrl | Blank_Sponge | Control_T1 | Control_T2 | QC  | Sponge_T1 | Sponge_T2 |
|---------------------------------|------------|--------------|------------|------------|-----|-----------|-----------|
| <b>MIN</b>                      | 0          | 0            | 0          | 0          | 0   | 1         | 1         |
| <b>MAX</b>                      | 27         | 24           | 253        | 228        | 304 | 272       | 270       |
| <b>MEAN</b>                     | 2          | 2            | 17         | 17         | 20  | 19        | 20        |
| Number of buckets with a SNR<3  | 380        | 338          | 79         | 72         | 77  | 71        | 79        |
| <b>% SNR &lt;3</b>              | 92%        | 82%          | 19%        | 18%        | 19% | 17%       | 19%       |
| Number of buckets with a SNR<10 | 396        | 395          | 267        | 262        | 247 | 263       | 258       |
| <b>% SNR &lt;10</b>             | 96%        | 96%          | 65%        | 64%        | 60% | 64%       | 63%       |
| Total buckets                   | 411        | 411          | 411        | 411        | 411 | 411       | 411       |
